# Supplementary material for: Structure Activity Relationship of Brevenal Hydrazide Derivatives
Source: MDPI journal article supplement (doi:10.3390/md12041839), 2014-03-28
Supplement: s1 [file s1]

## Supplementary Information

- Figure S1.**  $^1\text{H}$  NMR spectrum of compound **11**.  
**Figure S2.** HRMS spectrum of compound **11**.  
**Figure S3.**  $^1\text{H}$  NMR spectrum of compound **12**.  
**Figure S4.** HRMS spectrum of compound **12**.  
**Figure S5.**  $^1\text{H}$  NMR spectrum of compound **13**.  
**Figure S6.** HRMS spectrum of compound **13**.  
**Figure S7.**  $^1\text{H}$  NMR spectrum of compound **14**.  
**Figure S8.** HRMS spectrum of compound **14**.  
**Figure S9.**  $^1\text{H}$  NMR spectrum of compound **15**.  
**Figure S10.** HRMS spectrum of compound **15**.  
**Figure S11.**  $^1\text{H}$  NMR spectrum of compound **16**.  
**Figure S12.** HRMS spectrum of compound **16**.  
**Figure S13.**  $^1\text{H}$  NMR spectrum of compound **17**.  
**Figure S14.** HRMS spectrum of compound **17**.  
**Figure S15.**  $^1\text{H}$  NMR spectrum of compound **18**.  
**Figure S16.** HRMS spectrum of compound **18**.  
**Figure S17.**  $^1\text{H}$  NMR spectrum of compound **19**.  
**Figure S18.** HRMS spectrum of compound **19**.  
**Figure S19.**  $^1\text{H}$  NMR spectrum of compound **20**.  
**Figure S20.** HRMS spectrum of compound **20**.  
**Figure S21.**  $^1\text{H}$  NMR spectrum of compound **21**.  
**Figure S22.** HRMS spectrum of compound **21**.  
**Figure S23.**  $^1\text{H}$  NMR spectrum of compound **22**.  
**Figure S24.** HRMS spectrum of compound **22**.  
**Figure S25.**  $^1\text{H}$  NMR spectrum of compound **23**.  
**Figure S26.** HRMS spectrum of compound **23**.  
**Figure S27.**  $^1\text{H}$  NMR spectrum of compound **24**.  
**Figure S28.** HRMS spectrum of compound **24**.  
**Figure S29.**  $^1\text{H}$  NMR spectrum of compound **25**.  
**Figure S30.** HRMS spectrum of compound **25**.  
**Figure S31.**  $^1\text{H}$  NMR spectrum of compound **26**.  
**Figure S32.** HRMS spectrum of compound **26**.  
**Figure S33.**  $^1\text{H}$  NMR spectrum of compound **27**.  
**Figure S34.** HRMS spectrum of compound **27**.  
**Figure S35.**  $^1\text{H}$  NMR spectrum of compound **28**.  
**Figure S36.** HRMS spectrum of compound **28**.  
**Figure S37.**  $^1\text{H}$  NMR spectrum of compound **29**.  
**Figure S38.** HRMS spectrum of compound **29**.  
**Figure S39.**  $^1\text{H}$  NMR spectrum of compound **30**.  
**Figure S40.** HRMS spectrum of compound **30**.  
**Figure S41.**  $^1\text{H}$  NMR spectrum of compound **31**.

- Figure S42.** HRMS spectrum of compound **31**.  
**Figure S43.**  $^1\text{H}$  NMR spectrum of compound **32**.  
**Figure S44.** HRMS spectrum of compound **32**.  
**Figure S45.**  $^1\text{H}$  NMR spectrum of compound **33**.  
**Figure S46.** HRMS spectrum of compound **33**.  
**Figure S47.**  $^1\text{H}$  NMR spectrum of compound **34**.  
**Figure S48.** HRMS spectrum of compound **34**.  
**Figure S49.**  $^1\text{H}$  NMR spectrum of compound **35**.  
**Figure S50.** HRMS spectrum of compound **35**.  
**Figure S51.**  $^1\text{H}$  NMR spectrum of compound **37**.  
**Figure S52.**  $^1\text{H}$  NMR spectrum of compound **38a**.  
**Figure S53.**  $^1\text{H}$  NMR spectrum of compound **38b**.  
**Figure S54.**  $^1\text{H}$  NMR spectrum of compound **38c**.  
**Figure S55.**  $^1\text{H}$  NMR spectrum of compound **38d**.  
**Figure S56.**  $^1\text{H}$  NMR spectrum of compound **39a**.  
**Figure S57.** TIC and MS spectrum of compound **39a**.  
**Figure S58.**  $^1\text{H}$  NMR spectrum of compound **39b**.  
**Figure S59.** TIC and MS spectrum of compound **39b**.  
**Figure S60.**  $^1\text{H}$  NMR spectrum of compound **39c**.  
**Figure S61.** TIC and MS spectrum of compound **39c**.  
**Figure S62.**  $^1\text{H}$  NMR spectrum of compound **39d**.  
**Figure S63.** TIC and MS spectrum of compound **39d**.  
**Figure S64.**  $^1\text{H}$  NMR spectrum of compound **41**.  
**Figure S65.** TIC and MS spectrum of compound **41**.  
**Figure S66.**  $^1\text{H}$  NMR spectrum of compound **44a**.  
**Figure S67.** TIC and MS spectrum of compound **44a**.  
**Figure S68.**  $^1\text{H}$  NMR spectrum of compound **44b**.  
**Figure S69.** TIC and MS spectrum of compound **44b**.  
**Figure S70.**  $^1\text{H}$  NMR spectrum of compound **44c**.  
**Figure S71.** TIC and MS spectrum of compound **44c**.  
**Figure S72.**  $^1\text{H}$  NMR spectrum of compound **44d**.  
**Figure S73.** TIC and MS spectrum of compound **44d**.

Figure S1.  $^1\text{H}$  NMR spectrum of compound 11.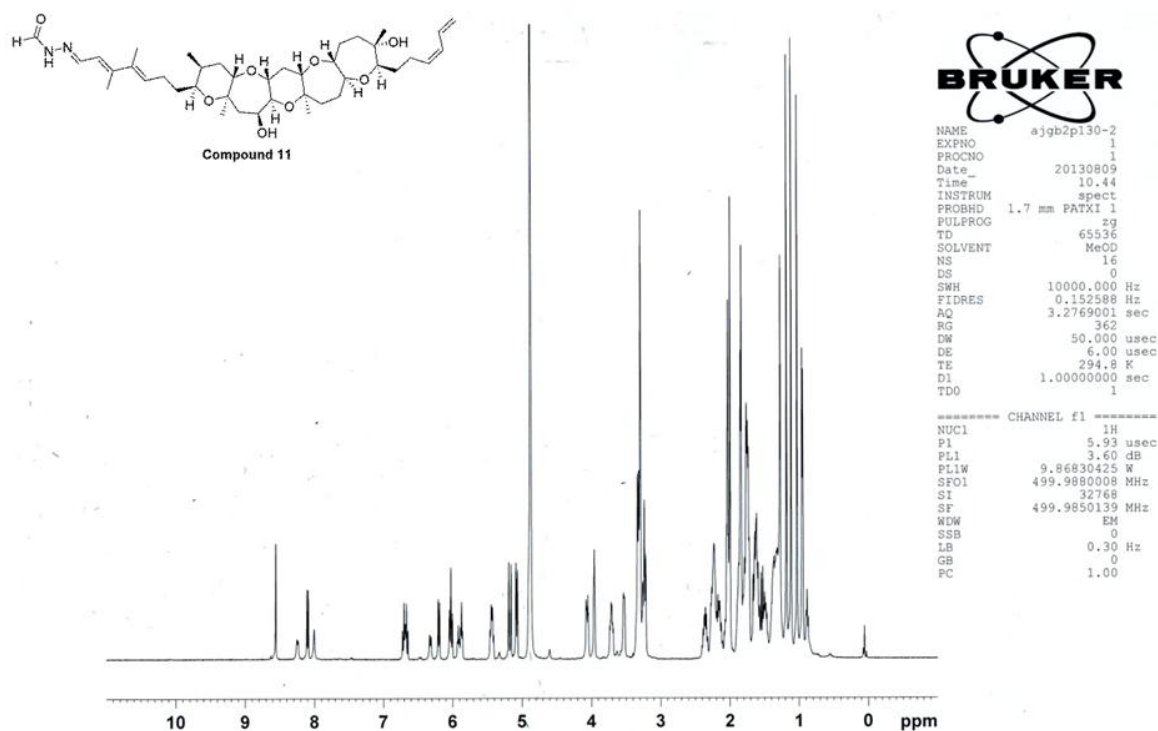

Figure S2. HRMS spectrum of compound 11.

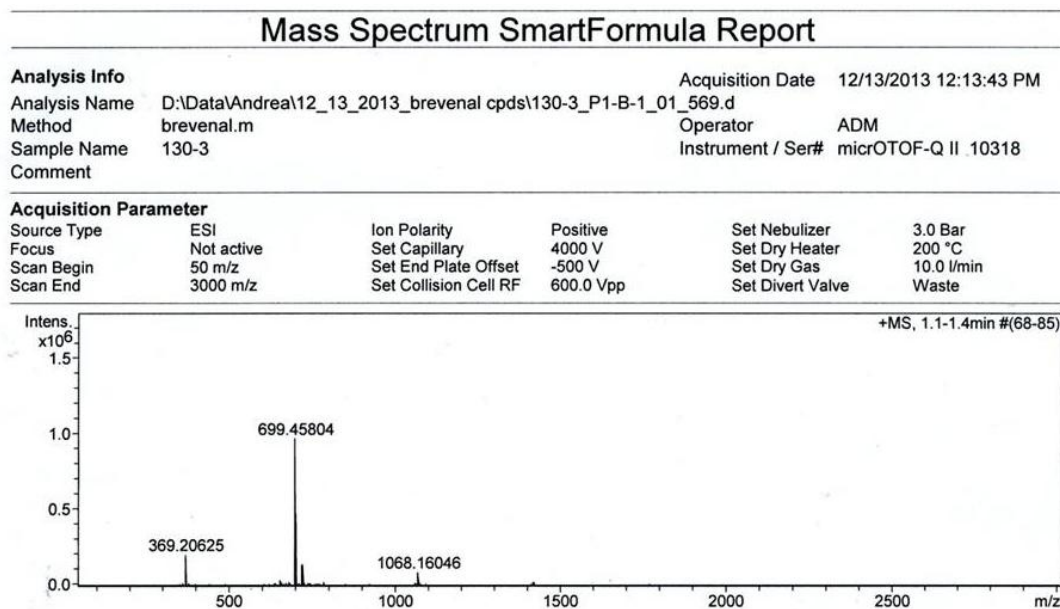

**Figure S3.**  $^1\text{H}$  NMR spectrum of compound 12.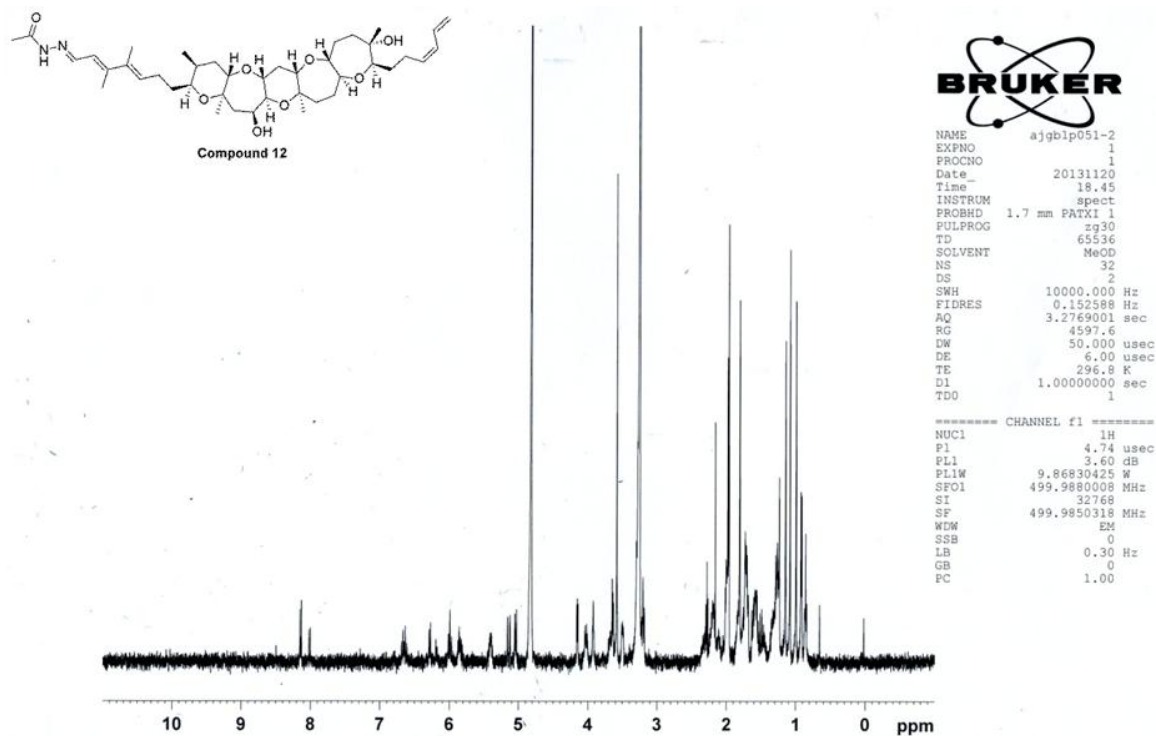**Figure S4.** HRMS spectrum of compound 12.**Mass Spectrum SmartFormula Report**

|                      |                                                                         |                   |                        |
|----------------------|-------------------------------------------------------------------------|-------------------|------------------------|
| <b>Analysis Info</b> |                                                                         | Acquisition Date  | 12/20/2013 10:52:54 AM |
| Analysis Name        | D:\Data\Andrea\12_20_2013_brevenal cpds 2\brevenal acet_P1-C-1_01_592.d | Operator          | ADM                    |
| Method               | brevenal.m                                                              | Instrument / Ser# | micrOTOF-Q II 10318    |
| Sample Name          | brevenal acet                                                           |                   |                        |
| Comment              |                                                                         |                   |                        |

**Acquisition Parameter**

|             |            |                       |           |                  |            |
|-------------|------------|-----------------------|-----------|------------------|------------|
| Source Type | ESI        | Ion Polarity          | Positive  | Set Nebulizer    | 3.0 Bar    |
| Focus       | Not active | Set Capillary         | 4000 V    | Set Dry Heater   | 200 °C     |
| Scan Begin  | 50 m/z     | Set End Plate Offset  | -500 V    | Set Dry Gas      | 10.0 l/min |
| Scan End    | 3000 m/z   | Set Collision Cell RF | 600.0 Vpp | Set Divert Valve | Waste      |

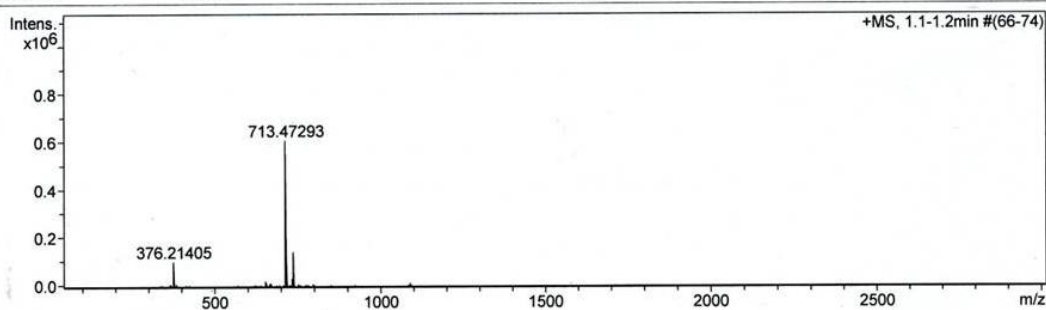

**Figure S5.**  $^1\text{H}$  NMR spectrum of compound 13.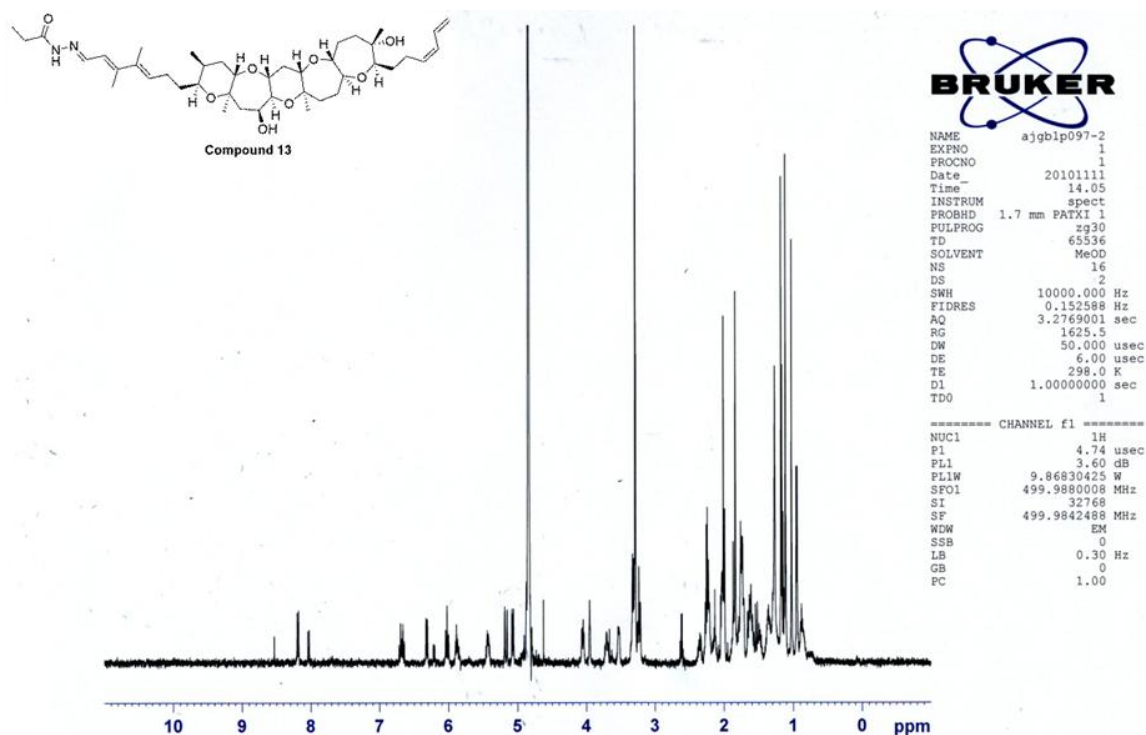**Figure S6.** HRMS spectrum of compound 13.**Mass Spectrum SmartFormula Report**

|                      |                                                                  |                   |                        |
|----------------------|------------------------------------------------------------------|-------------------|------------------------|
| <b>Analysis Info</b> |                                                                  | Acquisition Date  | 12/20/2013 10:43:35 AM |
| Analysis Name        | D:\Data\Andrea\12_20_2013_brevalen cpds 2\97-2-3_P1-B-8_01_590.d | Operator          | ADM                    |
| Method               | brevalen.m                                                       | Instrument / Ser# | micrOTOF-Q II 10318    |
| Sample Name          | 97-2-3                                                           |                   |                        |
| Comment              |                                                                  |                   |                        |

**Acquisition Parameter**

|             |            |                       |           |                  |            |
|-------------|------------|-----------------------|-----------|------------------|------------|
| Source Type | ESI        | Ion Polarity          | Positive  | Set Nebulizer    | 3.0 Bar    |
| Focus       | Not active | Set Capillary         | 4000 V    | Set Dry Heater   | 200 °C     |
| Scan Begin  | 50 m/z     | Set End Plate Offset  | -500 V    | Set Dry Gas      | 10.0 l/min |
| Scan End    | 3000 m/z   | Set Collision Cell RF | 600.0 Vpp | Set Divert Valve | Waste      |

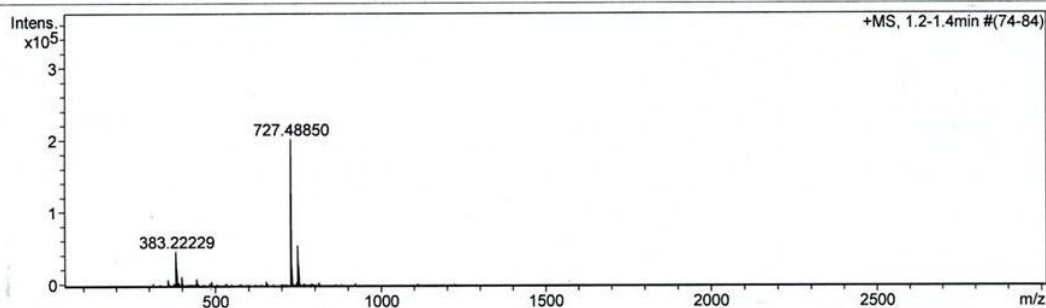

**Figure S7.**  $^1\text{H}$  NMR spectrum of compound 14.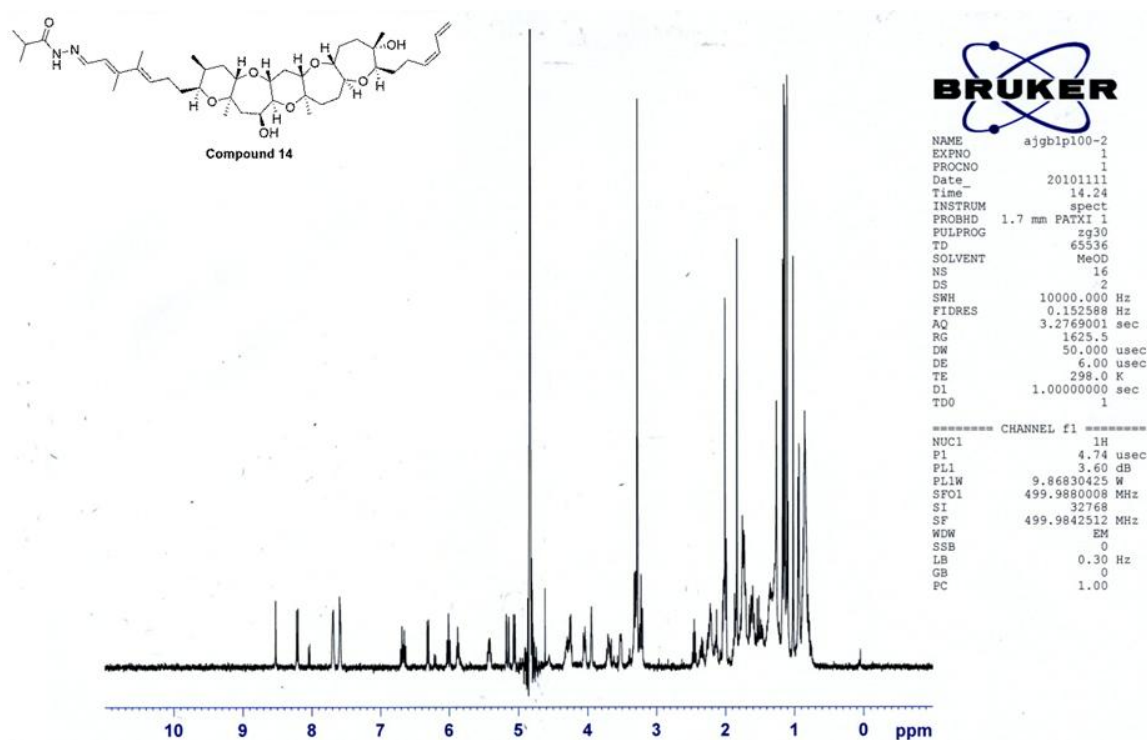**Figure S8.** HRMS spectrum of compound 14.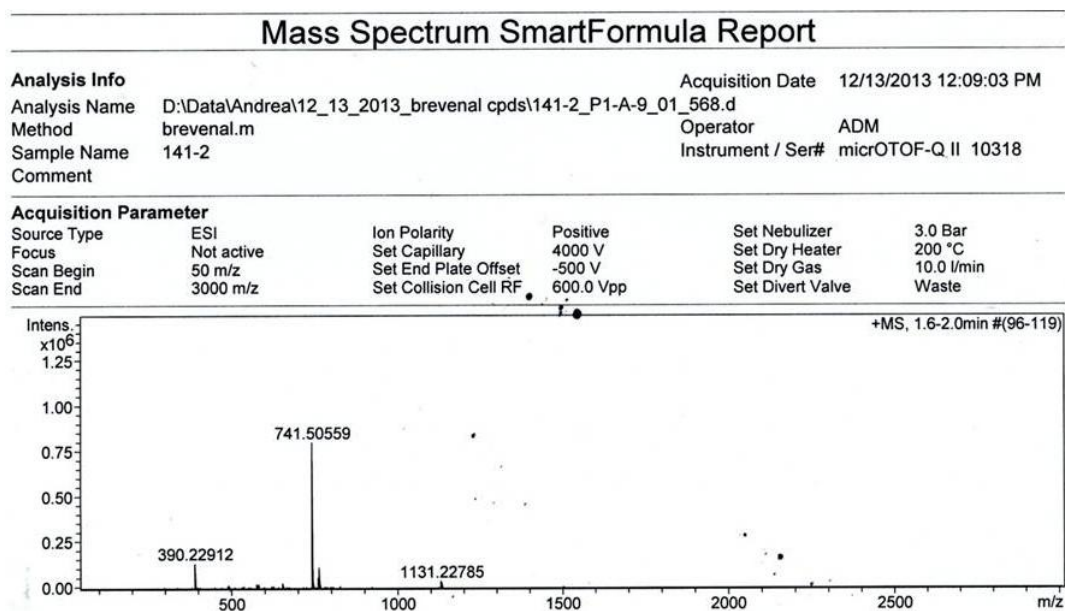



**Figure S9.**  $^1\text{H}$  NMR spectrum of compound 15.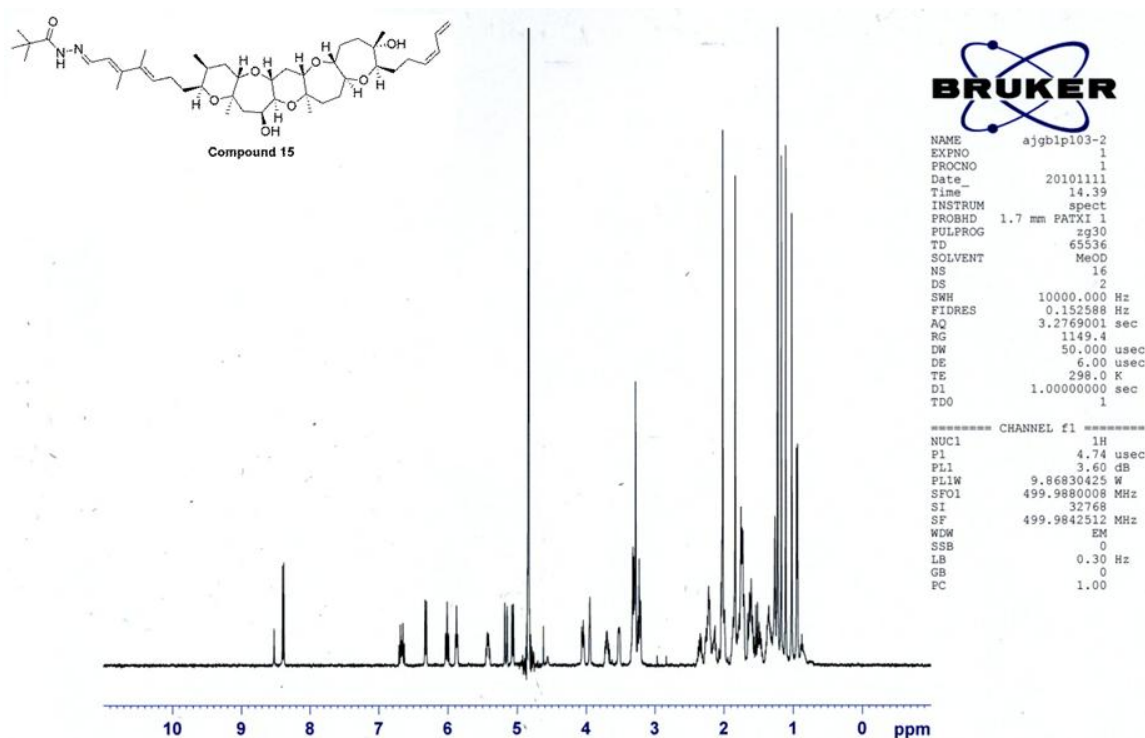**Figure S10.** HRMS spectrum of compound 15.**Mass Spectrum SmartFormula Report**

|                      |                                                                 |                   |                        |
|----------------------|-----------------------------------------------------------------|-------------------|------------------------|
| <b>Analysis Info</b> |                                                                 | Acquisition Date  | 12/20/2013 10:01:33 AM |
| Analysis Name        | D:\Data\Andrea\12_20_2013_breval cpds 2\103-2-5_P1-A-8_01_581.d | Operator          | ADM                    |
| Method               | breval.m                                                        | Instrument / Ser# | micrOTOF-Q II 10318    |
| Sample Name          | 103-2-5                                                         |                   |                        |
| Comment              |                                                                 |                   |                        |

**Acquisition Parameter**

|             |            |                       |           |                  |            |
|-------------|------------|-----------------------|-----------|------------------|------------|
| Source Type | ESI        | Ion Polarity          | Positive  | Set Nebulizer    | 3.0 Bar    |
| Focus       | Not active | Set Capillary         | 4000 V    | Set Dry Heater   | 200 °C     |
| Scan Begin  | 50 m/z     | Set End Plate Offset  | -500 V    | Set Dry Gas      | 10.0 l/min |
| Scan End    | 3000 m/z   | Set Collision Cell RF | 600.0 Vpp | Set Divert Valve | Waste      |

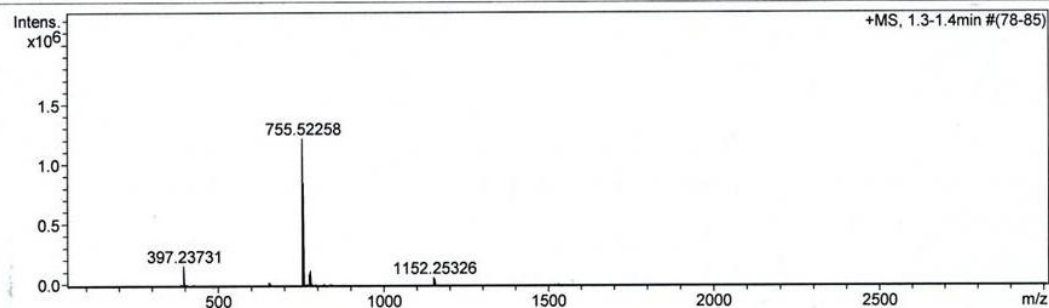

Figure S11.  $^1\text{H}$  NMR spectrum of compound 16.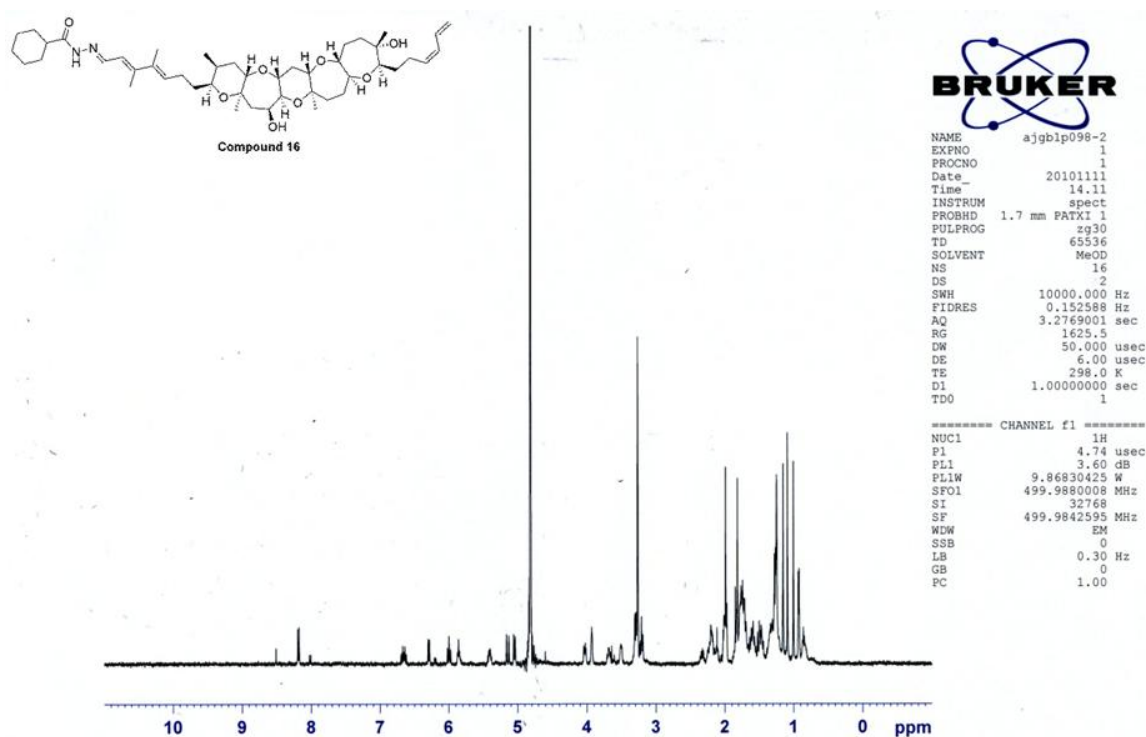

Figure S12. HRMS spectrum of compound 16.

## Mass Spectrum SmartFormula Report

|                      |                                                                |                   |                       |
|----------------------|----------------------------------------------------------------|-------------------|-----------------------|
| <b>Analysis Info</b> |                                                                | Acquisition Date  | 12/20/2013 9:56:50 AM |
| Analysis Name        | D:\Data\Andrea\12_20_2013_breval cpds 2\98-2-4_P1-A-7_01_580.d | Operator          | ADM                   |
| Method               | breval.m                                                       | Instrument / Ser# | micrOTOF-Q II 10318   |
| Sample Name          | 98-2-4                                                         |                   |                       |
| Comment              |                                                                |                   |                       |

**Acquisition Parameter**

|             |            |                       |           |                  |            |
|-------------|------------|-----------------------|-----------|------------------|------------|
| Source Type | ESI        | Ion Polarity          | Positive  | Set Nebulizer    | 3.0 Bar    |
| Focus       | Not active | Set Capillary         | 4000 V    | Set Dry Heater   | 200 °C     |
| Scan Begin  | 50 m/z     | Set End Plate Offset  | -500 V    | Set Dry Gas      | 10.0 l/min |
| Scan End    | 3000 m/z   | Set Collision Cell RF | 600.0 Vpp | Set Divert Valve | Waste      |

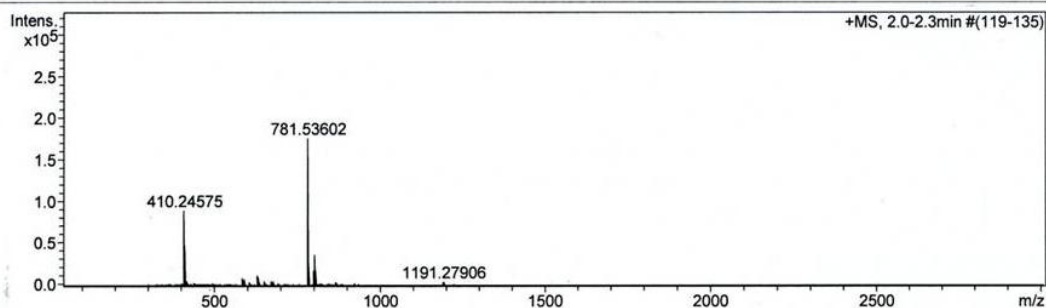



Figure S13.  $^1\text{H}$  NMR spectrum of compound 17.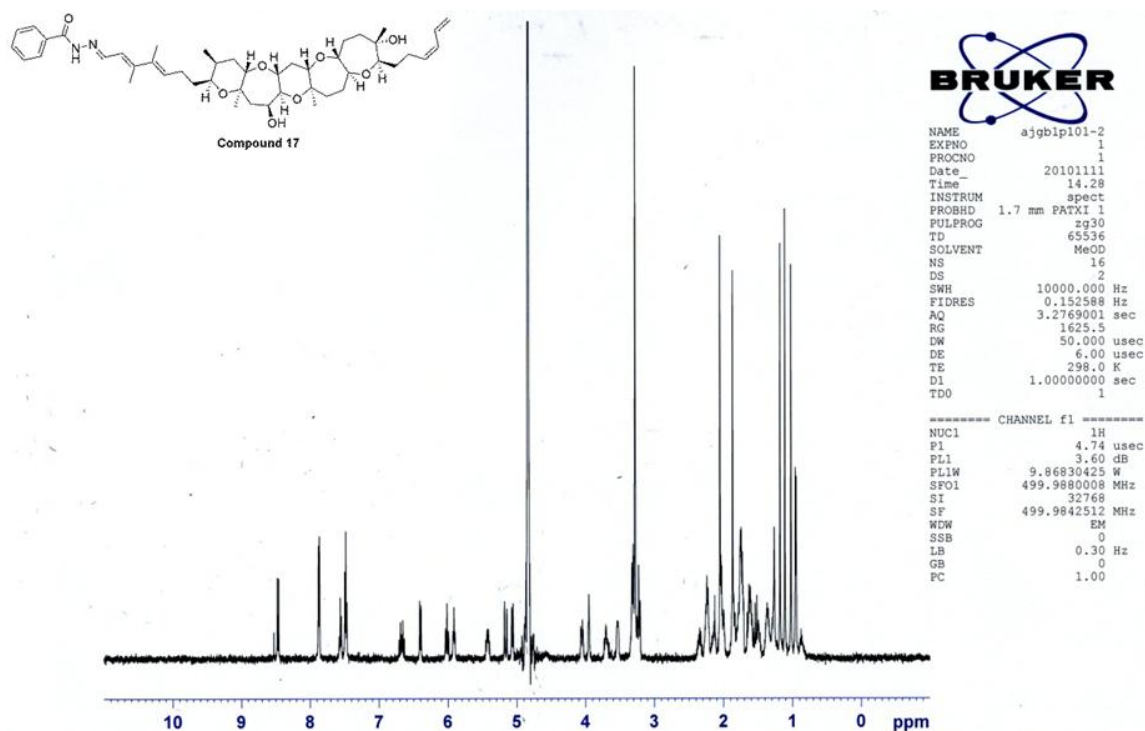

Figure S14. HRMS spectrum of compound 17.

## Mass Spectrum SmartFormula Report

|                      |                                                                 |                   |                        |
|----------------------|-----------------------------------------------------------------|-------------------|------------------------|
| <b>Analysis Info</b> |                                                                 | Acquisition Date  | 12/20/2013 10:48:14 AM |
| Analysis Name        | D:\Data\Andrea\12_20_2013_breval cpds 2\101-2-6_P1-B-9_01_591.d | Operator          | ADM                    |
| Method               | breval.m                                                        | Instrument / Ser# | micrOTOF-Q II 10318    |
| Sample Name          | 101-2-6                                                         |                   |                        |
| Comment              |                                                                 |                   |                        |

|                              |            |                       |            |
|------------------------------|------------|-----------------------|------------|
| <b>Acquisition Parameter</b> |            |                       |            |
| Source Type                  | ESI        | Ion Polarity          | Positive   |
| Focus                        | Not active | Set Capillary         | 4000 V     |
| Scan Begin                   | 50 m/z     | Set End Plate Offset  | -500 V     |
| Scan End                     | 3000 m/z   | Set Collision Cell RF | 600.0 Vpp  |
|                              |            | Set Nebulizer         | 3.0 Bar    |
|                              |            | Set Dry Heater        | 200 °C     |
|                              |            | Set Dry Gas           | 10.0 l/min |
|                              |            | Set Divert Valve      | Waste      |

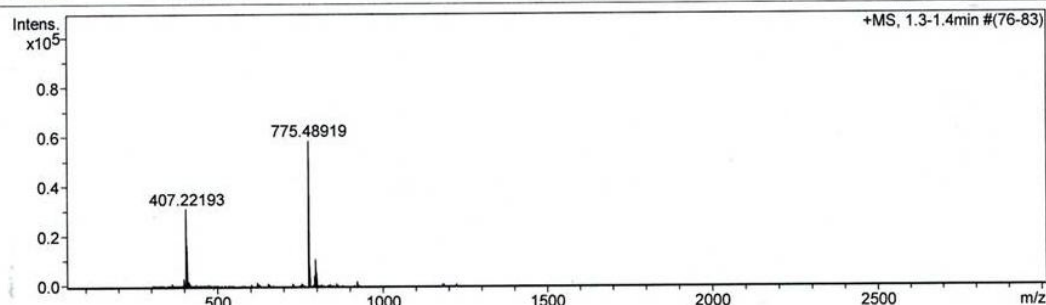

Figure S15.  $^1\text{H}$  NMR spectrum of compound 18.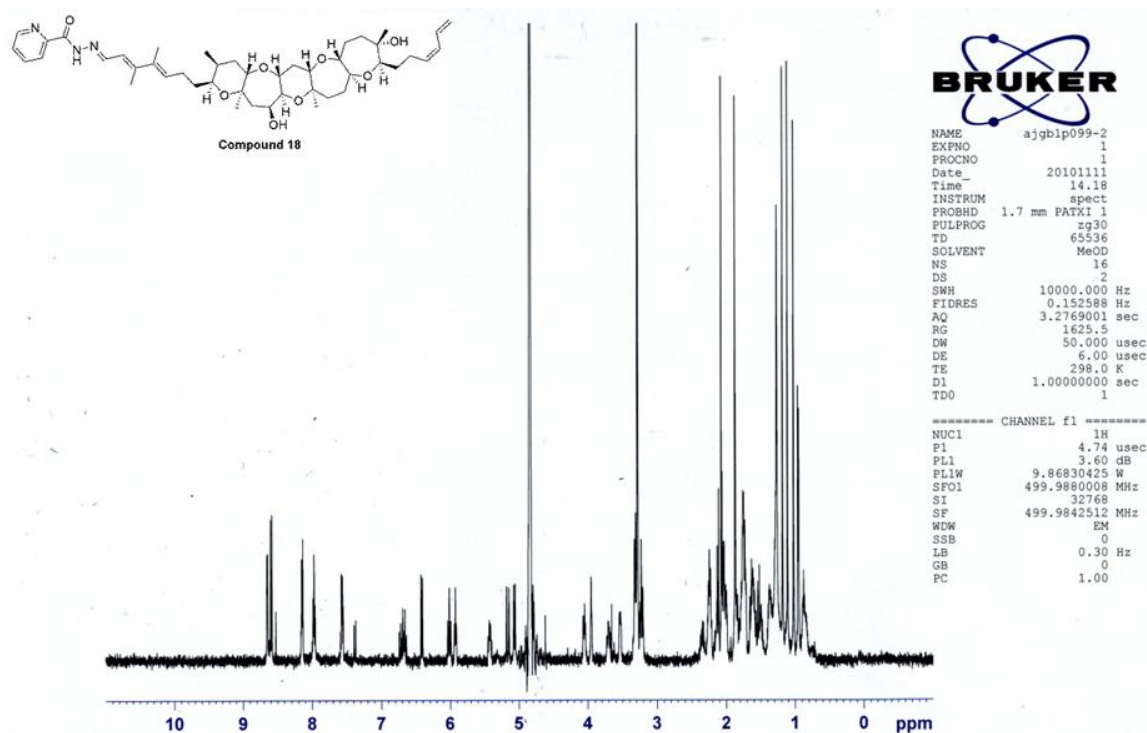

Figure S16. HRMS spectrum of compound 18.

## Mass Spectrum SmartFormula Report

|                      |                                                                |                   |                        |
|----------------------|----------------------------------------------------------------|-------------------|------------------------|
| <b>Analysis Info</b> |                                                                | Acquisition Date  | 12/20/2013 10:29:33 AM |
| Analysis Name        | D:\Data\Andrea\12_20_2013_breval cpds 2\pico-3_P1-B-5_01_587.d | Operator          | ADM                    |
| Method               | breval.m                                                       | Instrument / Ser# | micrOTOF-Q II 10318    |
| Sample Name          | pico-3                                                         |                   |                        |
| Comment              |                                                                |                   |                        |

|                              |            |                       |            |
|------------------------------|------------|-----------------------|------------|
| <b>Acquisition Parameter</b> |            |                       |            |
| Source Type                  | ESI        | Ion Polarity          | Positive   |
| Focus                        | Not active | Set Capillary         | 4000 V     |
| Scan Begin                   | 50 m/z     | Set End Plate Offset  | -500 V     |
| Scan End                     | 3000 m/z   | Set Collision Cell RF | 600.0 Vpp  |
|                              |            | Set Nebulizer         | 3.0 Bar    |
|                              |            | Set Dry Heater        | 200 °C     |
|                              |            | Set Dry Gas           | 10.0 l/min |
|                              |            | Set Divert Valve      | Waste      |

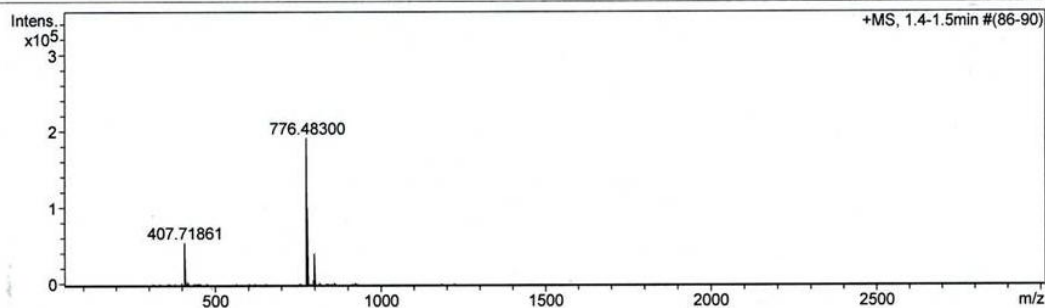

Figure S17.  $^1\text{H}$  NMR spectrum of compound 19.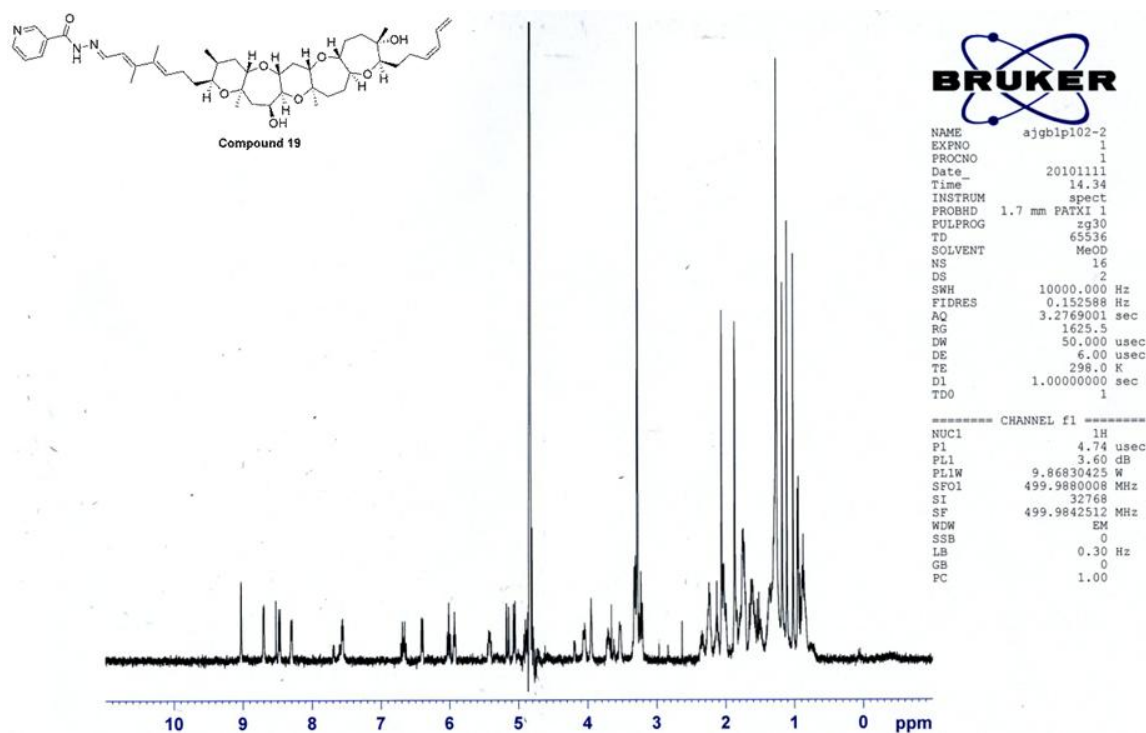

Figure S18. HRMS spectrum of compound 19.

## Mass Spectrum SmartFormula Report

|                      |                                                                   |                   |                        |
|----------------------|-------------------------------------------------------------------|-------------------|------------------------|
| <b>Analysis Info</b> |                                                                   | Acquisition Date  | 12/20/2013 10:10:51 AM |
| Analysis Name        | D:\Data\Andrea\12_20_2013_brevenal cpds 2\142-2-4_P1-B-1_01_583.d | Operator          | ADM                    |
| Method               | brevenal.m                                                        | Instrument / Ser# | micrOTOF-Q II 10318    |
| Sample Name          | 142-2-4                                                           |                   |                        |
| Comment              |                                                                   |                   |                        |

|                              |            |                       |           |                  |            |
|------------------------------|------------|-----------------------|-----------|------------------|------------|
| <b>Acquisition Parameter</b> |            |                       |           |                  |            |
| Source Type                  | ESI        | Ion Polarity          | Positive  | Set Nebulizer    | 3.0 Bar    |
| Focus                        | Not active | Set Capillary         | 4000 V    | Set Dry Heater   | 200 °C     |
| Scan Begin                   | 50 m/z     | Set End Plate Offset  | -500 V    | Set Dry Gas      | 10.0 l/min |
| Scan End                     | 3000 m/z   | Set Collision Cell RF | 600.0 Vpp | Set Divert Valve | Waste      |

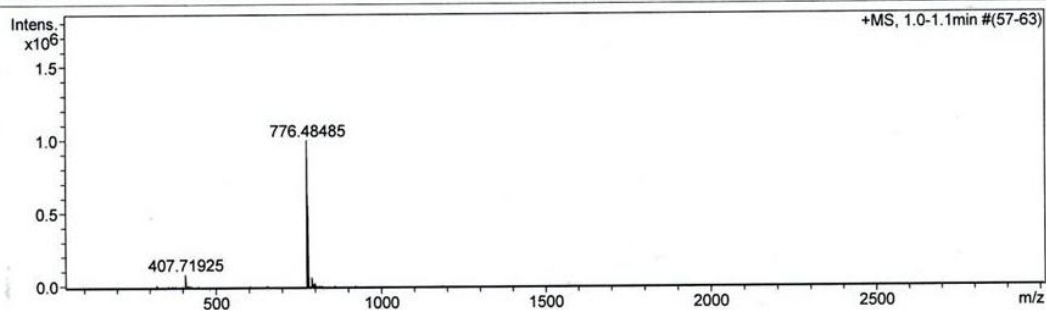

Figure S19. <sup>1</sup>H NMR spectrum of compound 20.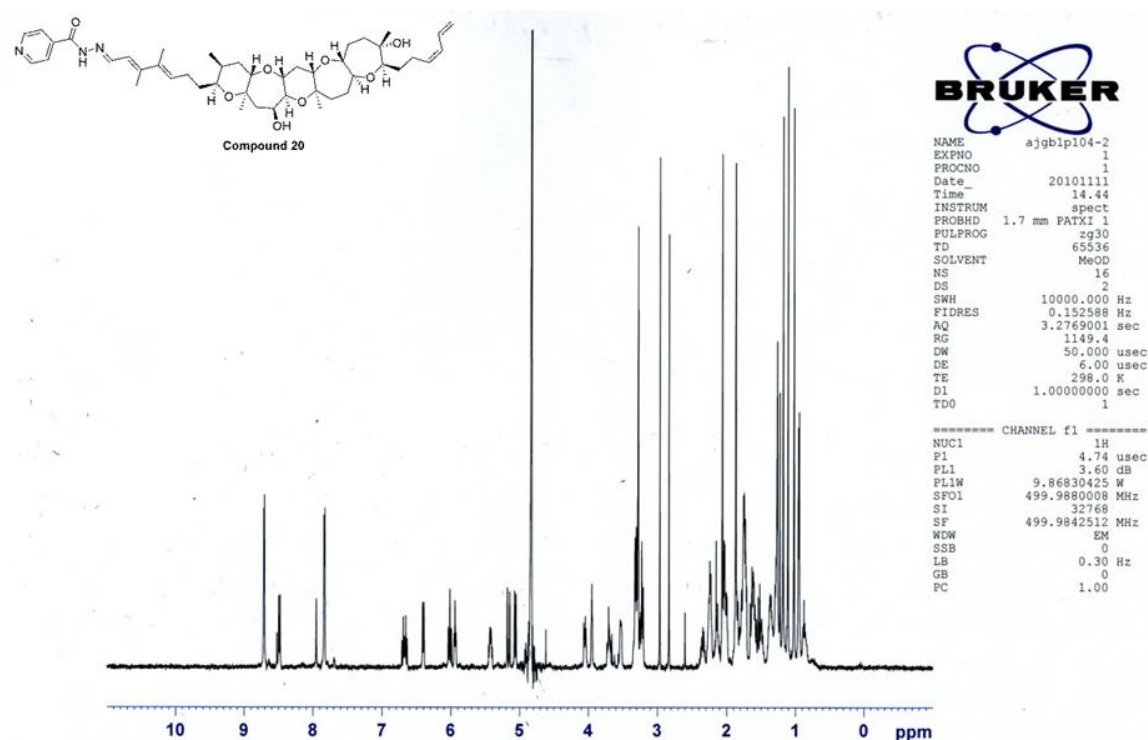

Figure S20. HRMS spectrum of compound 20.

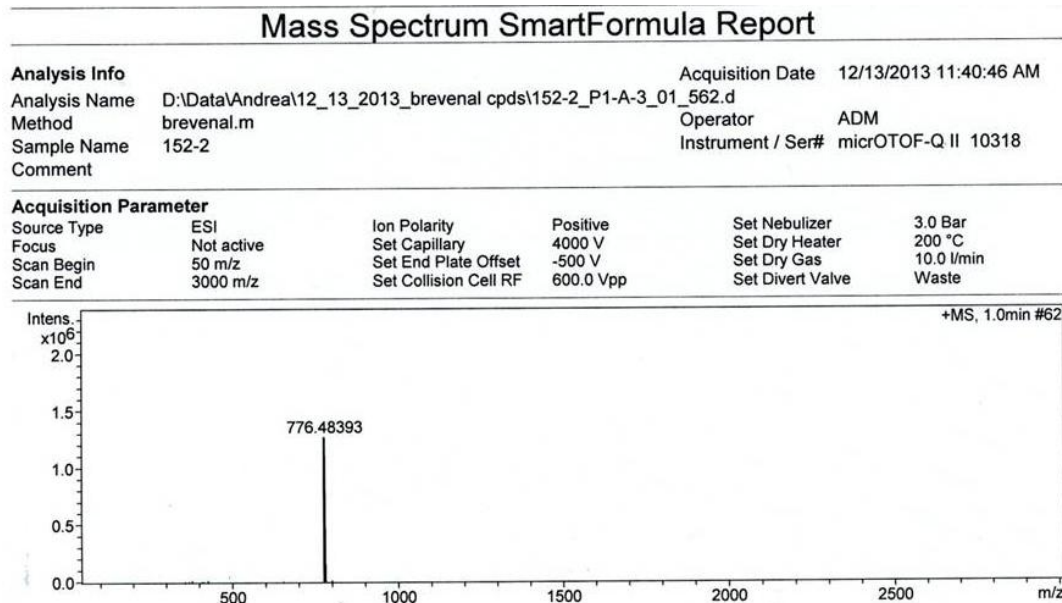

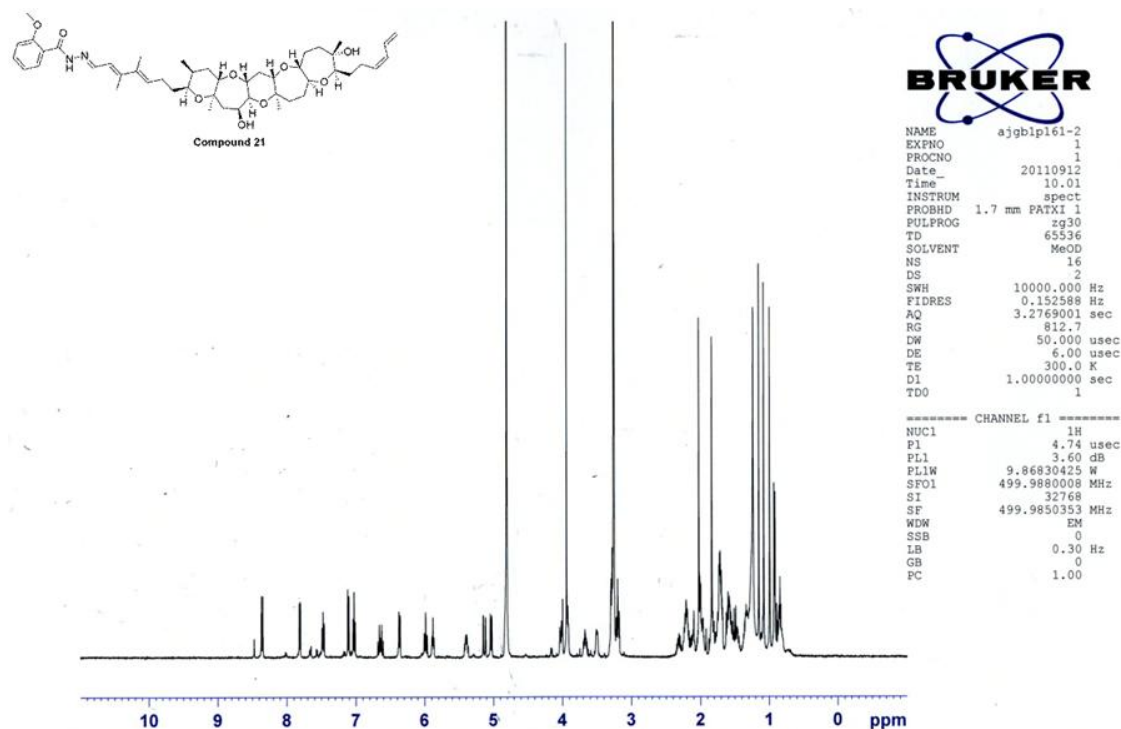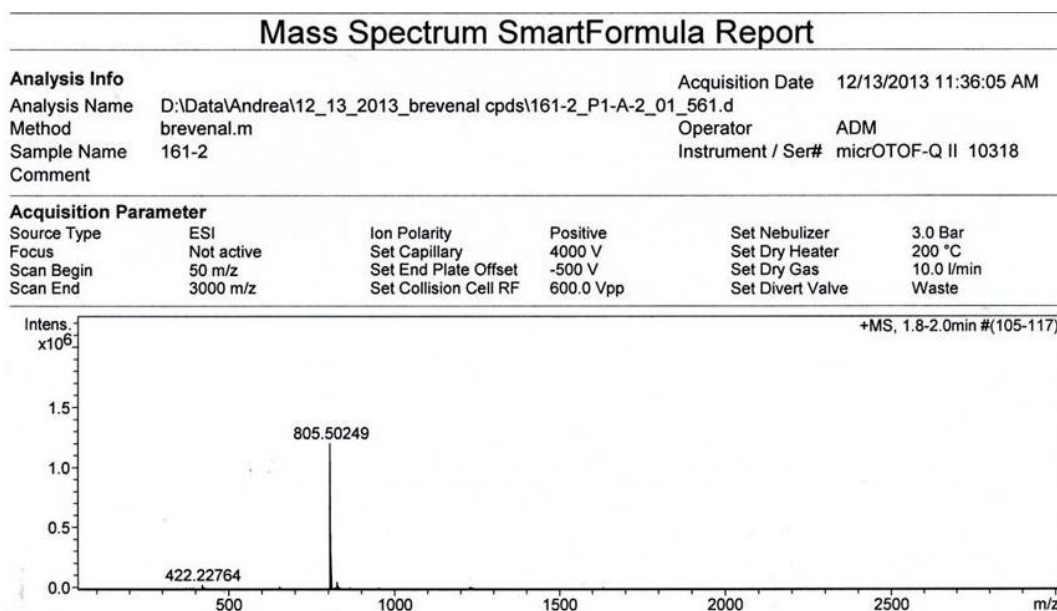



Figure S23.  $^1\text{H}$  NMR spectrum of compound 22.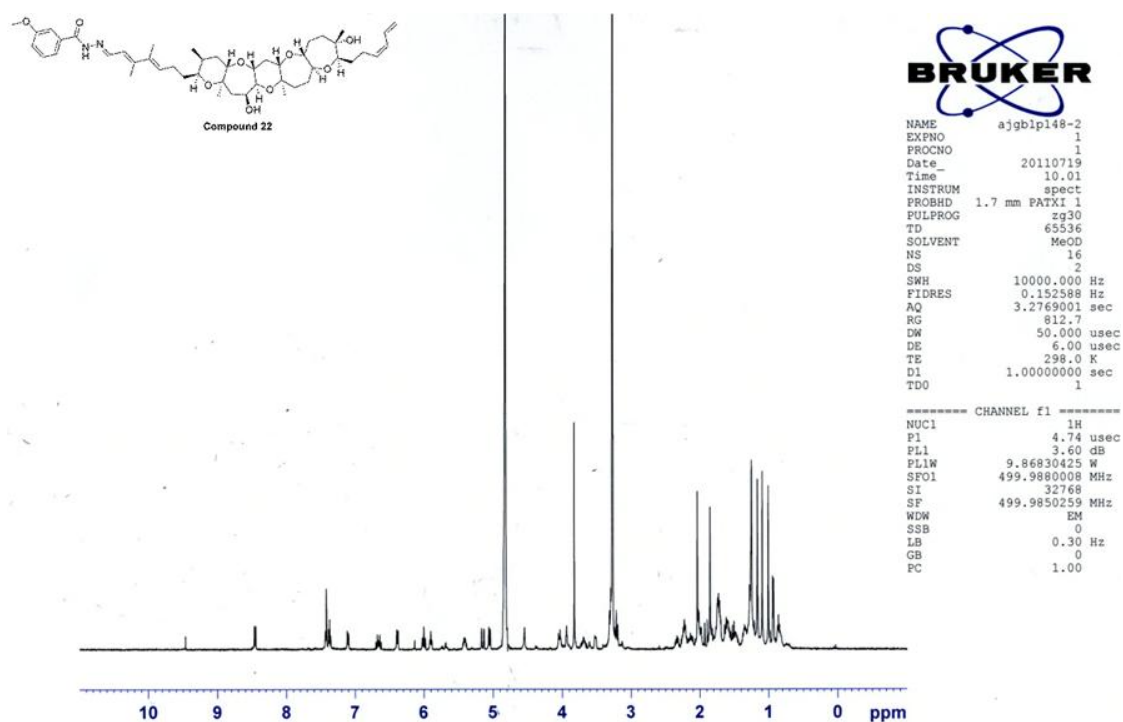

Figure S24. HRMS spectrum of compound 22.

## Mass Spectrum SmartFormula Report

|                      |                                                                 |                   |                      |
|----------------------|-----------------------------------------------------------------|-------------------|----------------------|
| <b>Analysis Info</b> |                                                                 | Acquisition Date  | 1/7/2014 10:36:13 AM |
| Analysis Name        | D:\Data\Andrea\01_07_2014_brevenal cpds 3\148-2_P1-A-3_01_598.d | Operator          | ADM                  |
| Method               | brevenal.m                                                      | Instrument / Ser# | micrOTOF-Q II 10318  |
| Sample Name          | 148-2                                                           |                   |                      |
| Comment              |                                                                 |                   |                      |

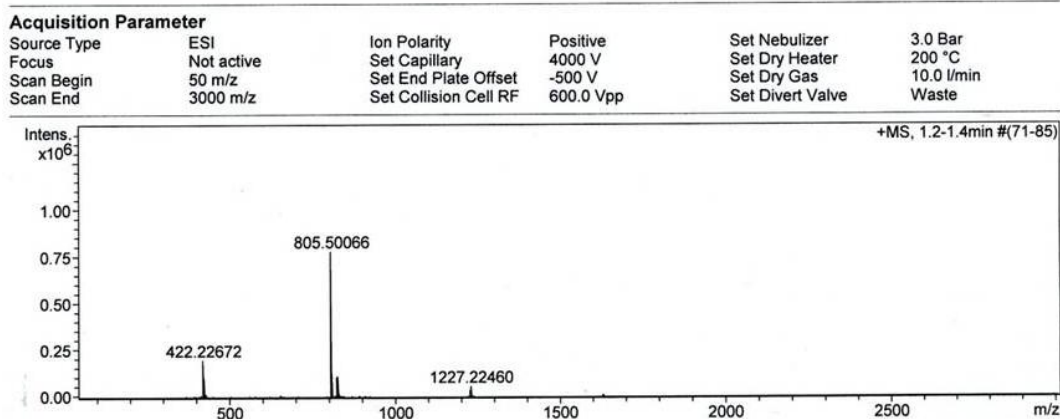





**Figure S27.**  $^1\text{H}$  NMR spectrum of compound **24**.

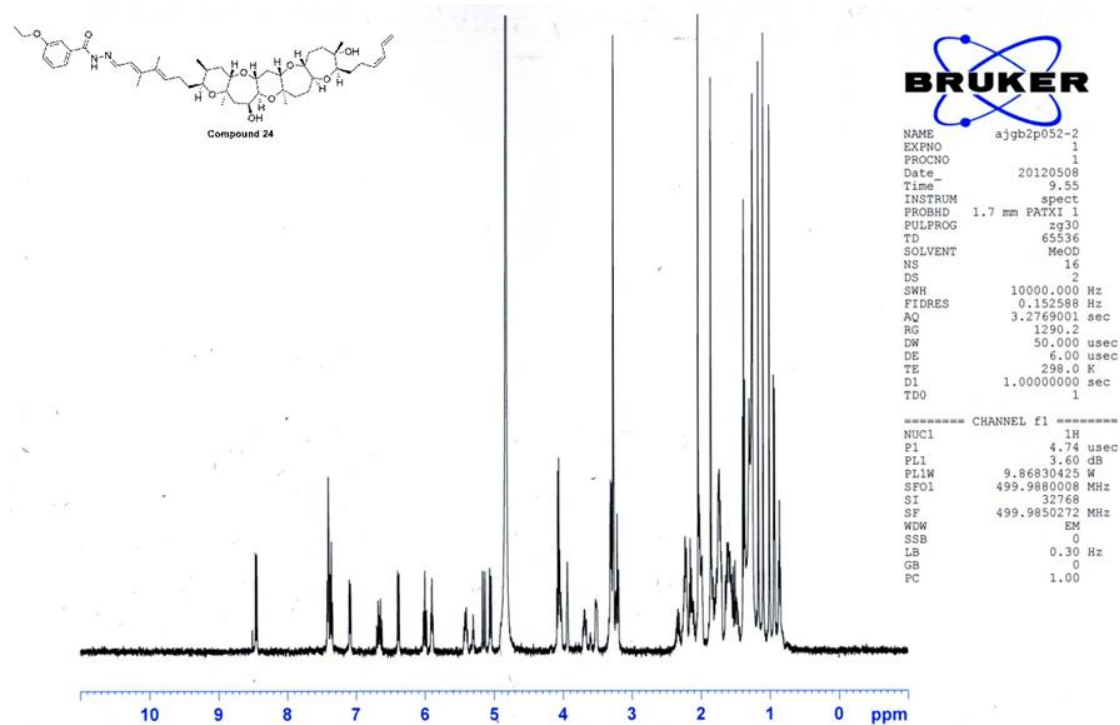

**Figure S28.** HRMS spectrum of compound **24**.

## Mass Spectrum SmartFormula Report

|                      |                                                            |                   |                        |
|----------------------|------------------------------------------------------------|-------------------|------------------------|
| <b>Analysis Info</b> |                                                            | Acquisition Date  | 12/13/2013 11:54:54 AM |
| Analysis Name        | D:\Data\Andrea\12_13_2013_breval cpds\52-2_P1-A-6_01_565.d |                   |                        |
| Method               | breval.m                                                   | Operator          | ADM                    |
| Sample Name          | 52-2                                                       | Instrument / Ser# | microTOF-Q II 10318    |
| Comment              |                                                            |                   |                        |

| Acquisition Parameter |            |                       |           |                  |            |
|-----------------------|------------|-----------------------|-----------|------------------|------------|
| Source Type           | ESI        | Ion Polarity          | Positive  | Set Nebulizer    | 3.0 Bar    |
| Focus                 | Not active | Set Capillary         | 4000 V    | Set Dry Heater   | 200 °C     |
| Scan Begin            | 50 m/z     | Set End Plate Offset  | -500 V    | Set Dry Gas      | 10.0 l/min |
| Scan End              | 3000 m/z   | Set Collision Cell RF | 600.0 Vpp | Set Divert Valve | Waste      |

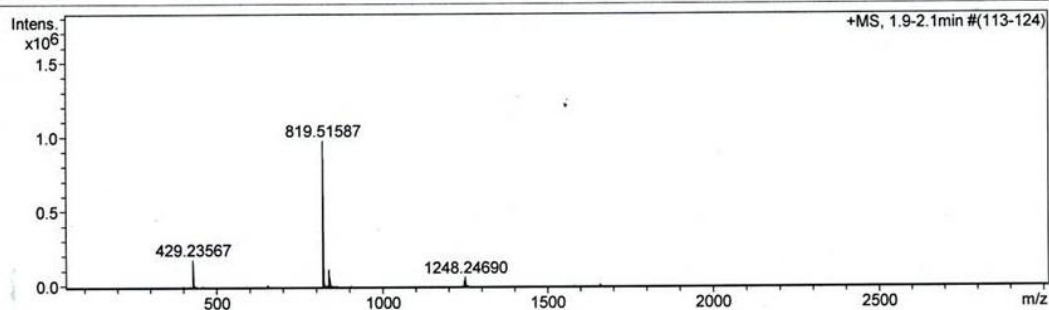

Figure S29.  $^1\text{H}$  NMR spectrum of compound 25.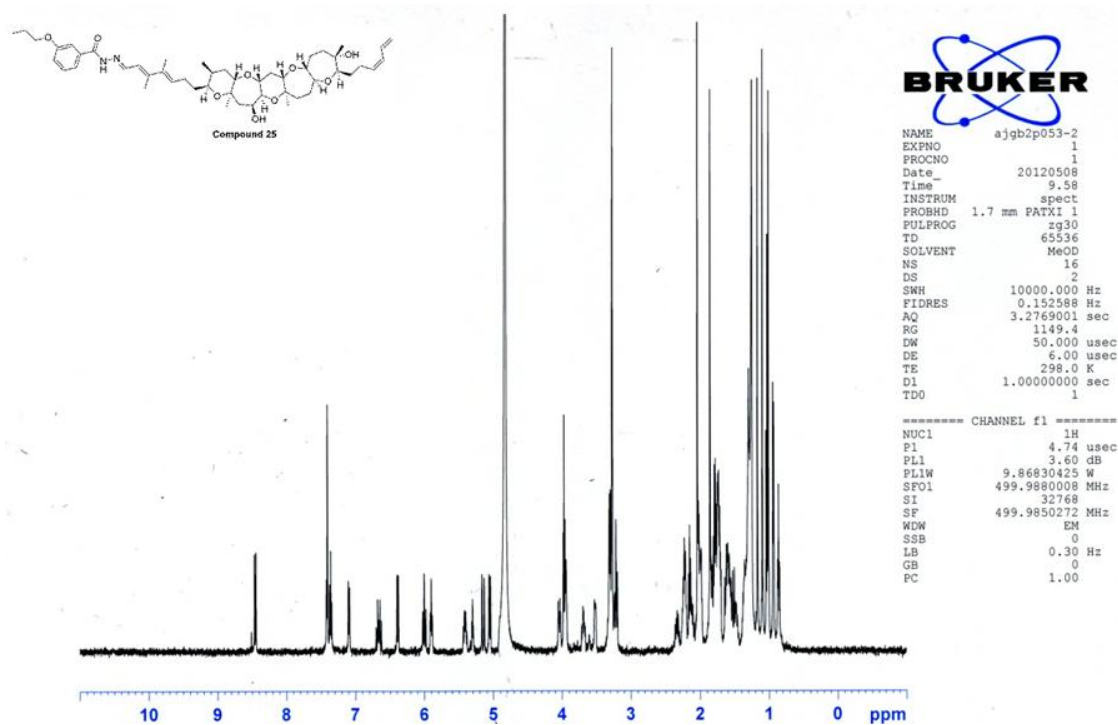

Figure S30. HRMS spectrum of compound 25.

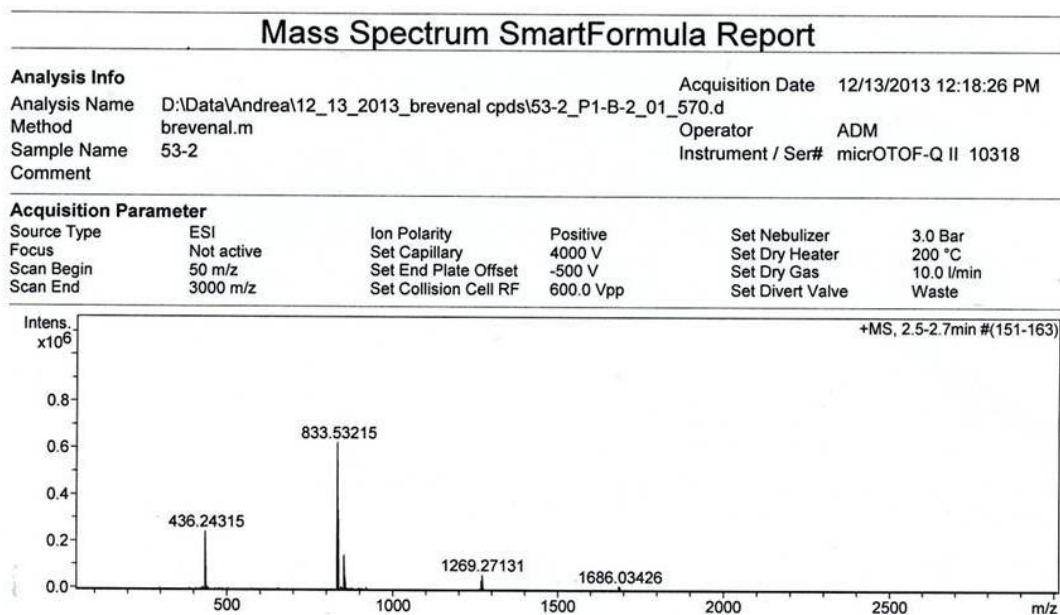



**Figure S33.**  $^1\text{H}$  NMR spectrum of compound **27**.

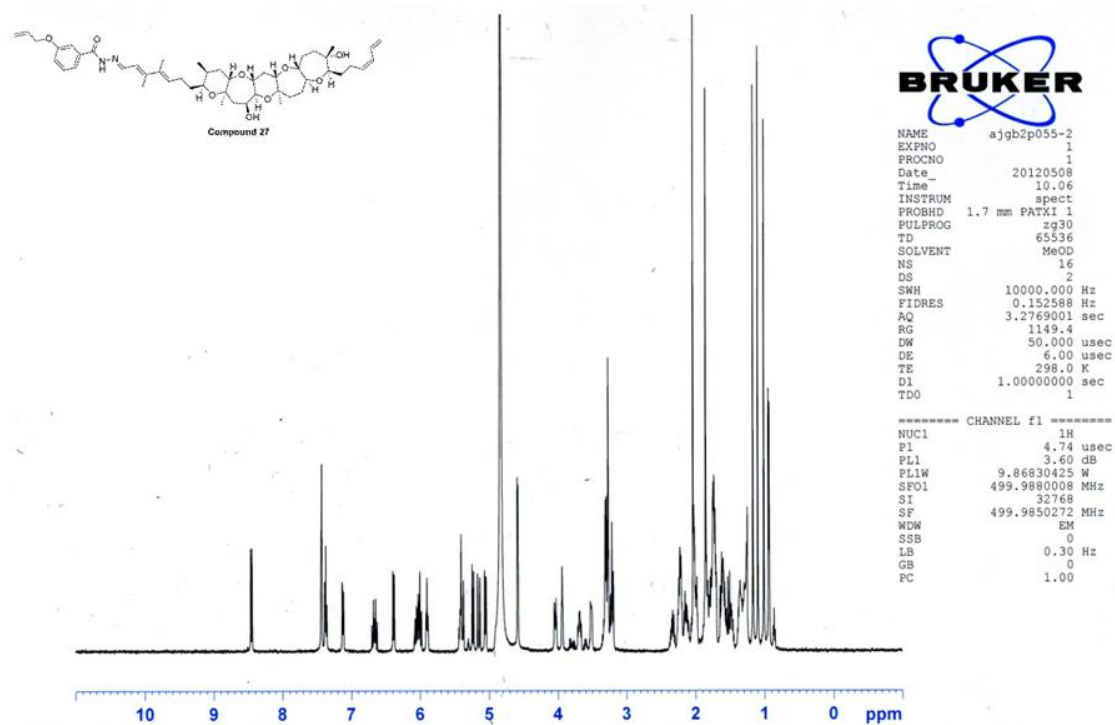

**Figure S34.** HRMS spectrum of compound **27**.

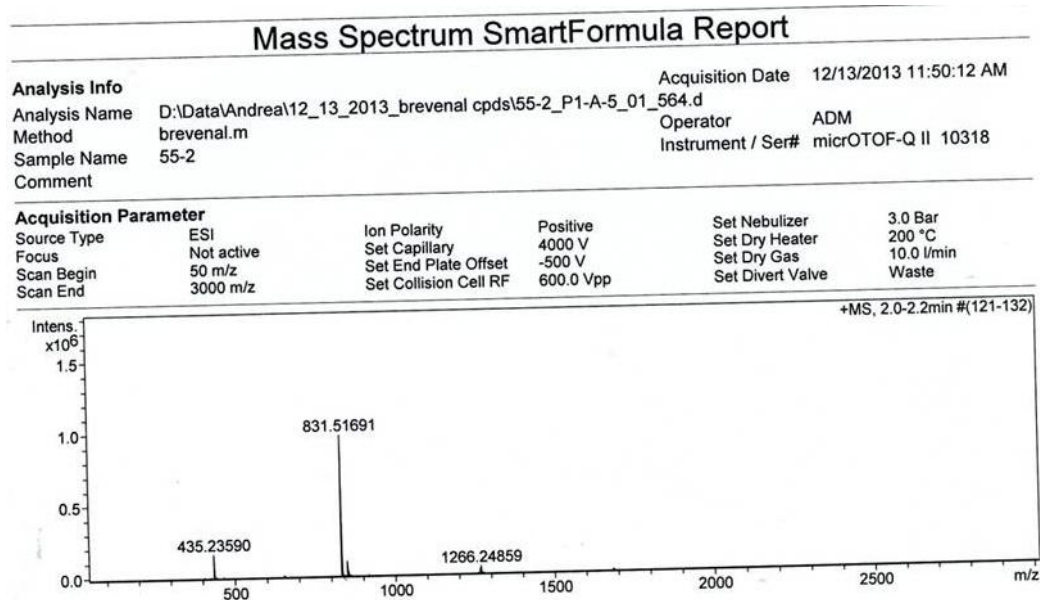

### Analysis Info

Analysis Name

## Method

Sample Name

**Comment**

Acquisition Date 12/13/2013 11:50:12 AM

564.d

Operator ADM  
Instrument / Ser# micrOTOF-Q II 10318

Acquisition ParameterSource Type

## Focus

Scan Begin  
Scan End

Scan END

ES

Not active  
EO m/z

3000 m/z

---

### Ion Polarity

Set CapillarySet End Plate Offset  
Set Collision Cell BESet Collision Cell RFPositive4000 V

-500 V  
600.0 V

000.0 vppSet NebulizerSet Dry HeaterSet Dry GasSet Divert Valve3.0 Bar200 °C10.0 l/min  
Wastewaste



Figure S35.  $^1\text{H}$  NMR spectrum of compound 28.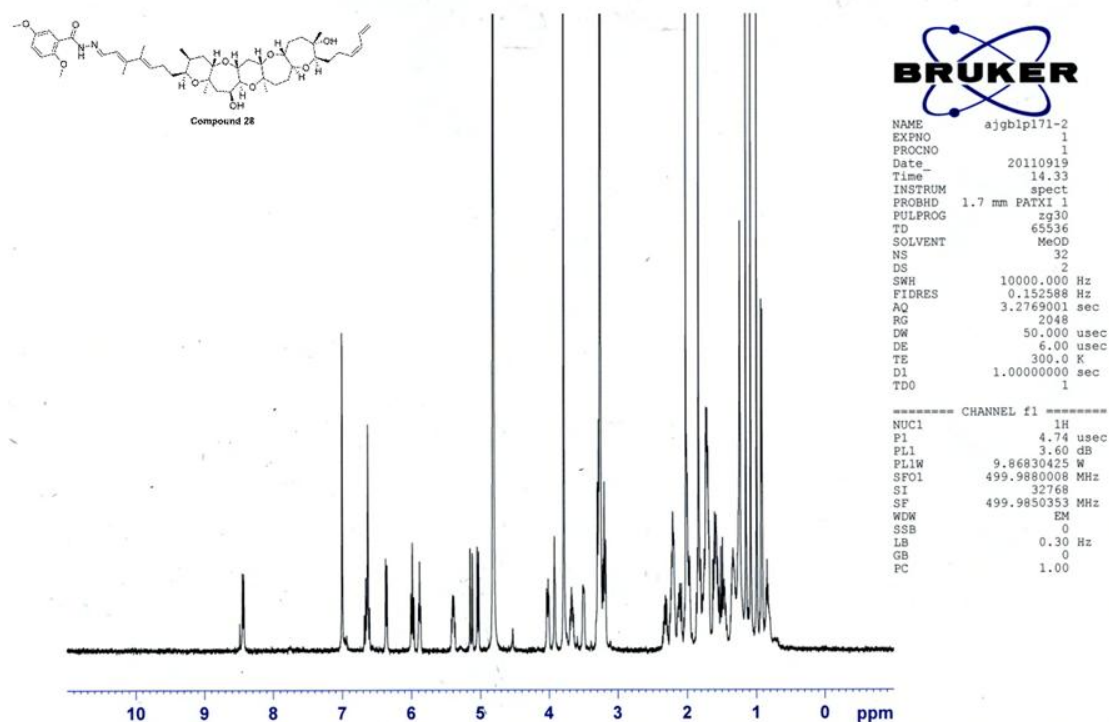

Figure S36. HRMS spectrum of compound 28.

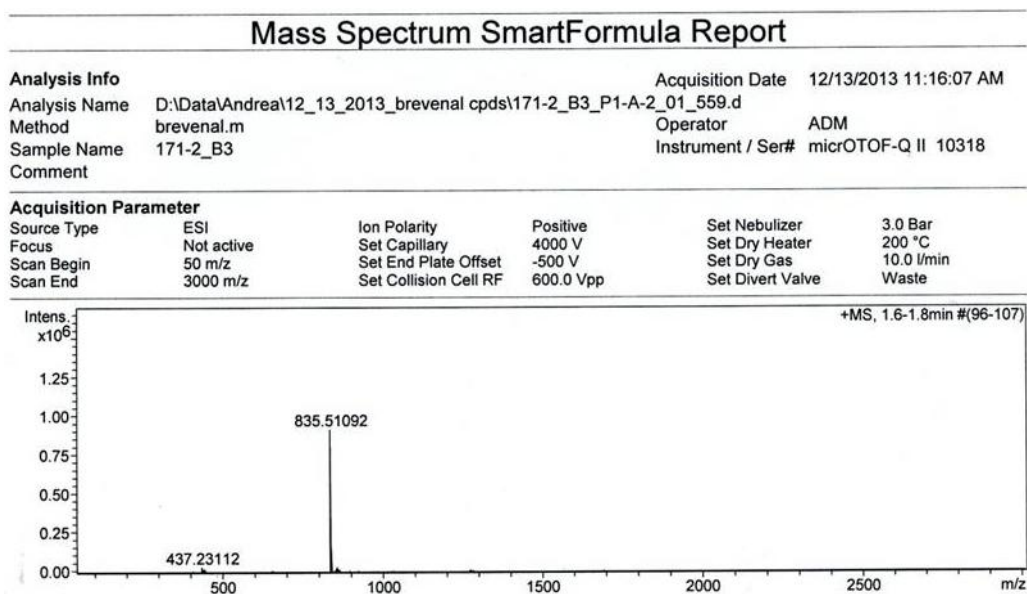



Figure S37.  $^1\text{H}$  NMR spectrum of compound 29.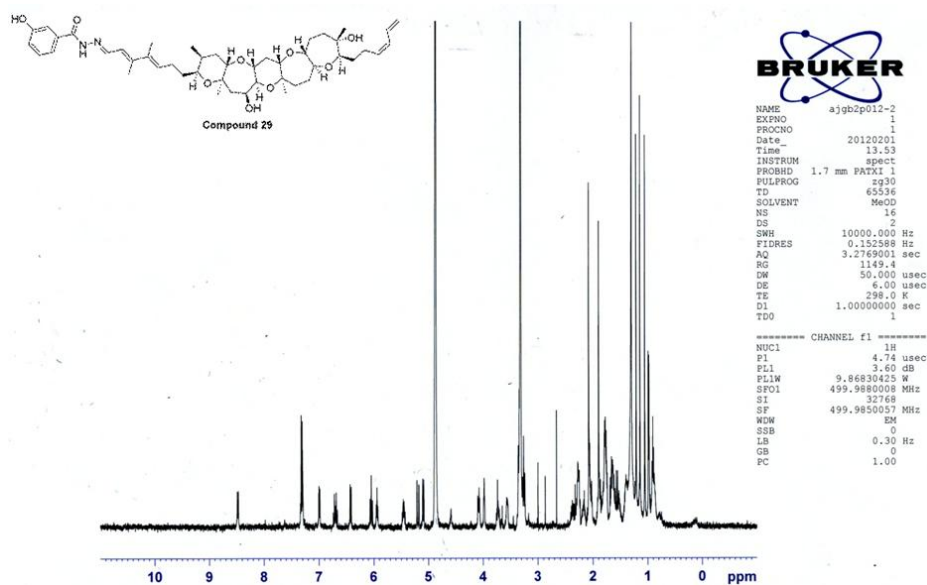

Figure S38. HRMS spectrum of compound 29.

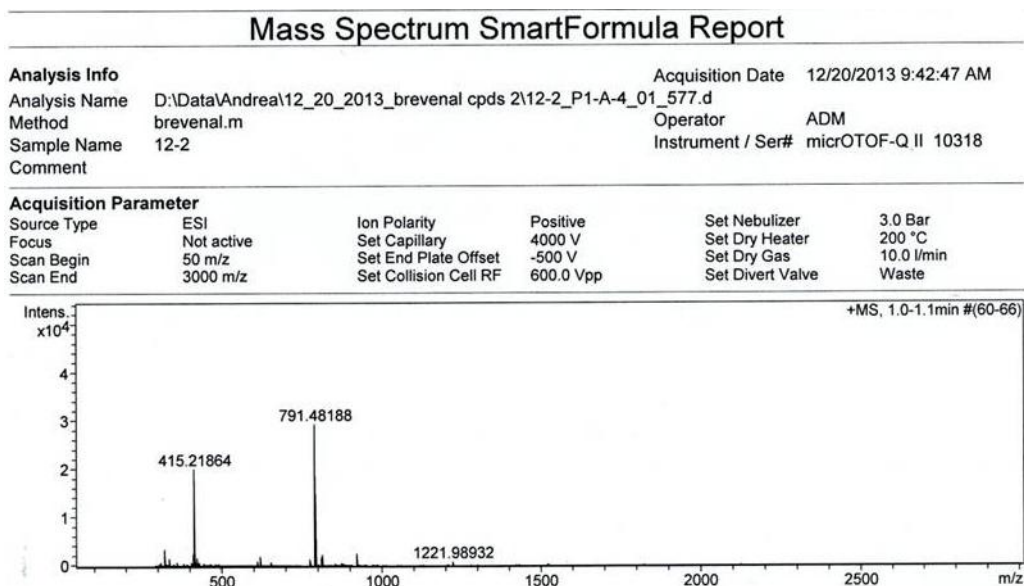

## Mass Spectrum SmartFormula Report

|                      |                                                                |                   |                       |
|----------------------|----------------------------------------------------------------|-------------------|-----------------------|
| <b>Analysis Info</b> |                                                                | Acquisition Date  | 12/20/2013 9:42:47 AM |
| Analysis Name        | D:\Data\Andrea\12_20_2013_brevenal cpds 2\12-2_P1-A-4_01_577.d | Operator          | ADM                   |
| Method               | brevenal.m                                                     | Instrument / Ser# | micrOTOF-Q II 10318   |
| Sample Name          | 12-2                                                           |                   |                       |
| Comment              |                                                                |                   |                       |

|                              |            |                       |           |                  |            |
|------------------------------|------------|-----------------------|-----------|------------------|------------|
| <b>Acquisition Parameter</b> |            | Ion Polarity          | Positive  | Set Nebulizer    | 3.0 Bar    |
| Source Type                  | ESI        | Set Capillary         | 4000 V    | Set Dry Heater   | 200 °C     |
| Focus                        | Not active | Set End Plate Offset  | -500 V    | Set Dry Gas      | 10.0 l/min |
| Scan Begin                   | 50 $m/z$   | Set Collision Cell RF | 600.0 Vpp | Set Divert Valve | Waste      |
| Scan End                     | 3000 $m/z$ |                       |           |                  |            |

Figure S39.  $^1\text{H}$  NMR spectrum of compound 30.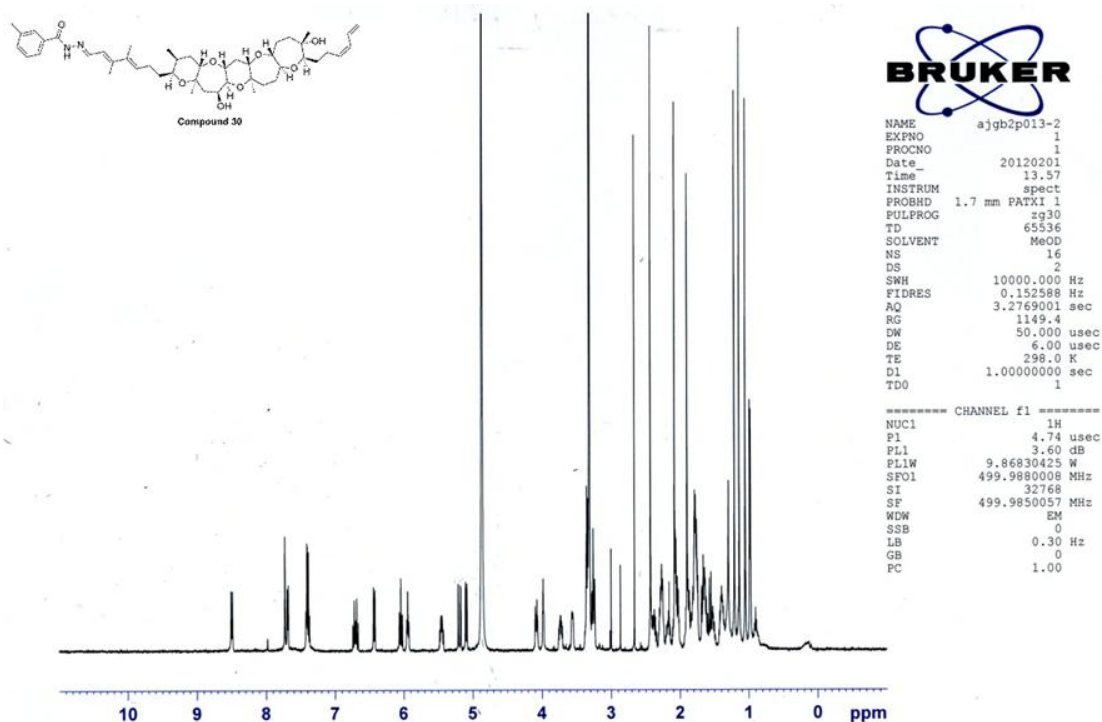

Figure S40. HRMS spectrum of compound 30.

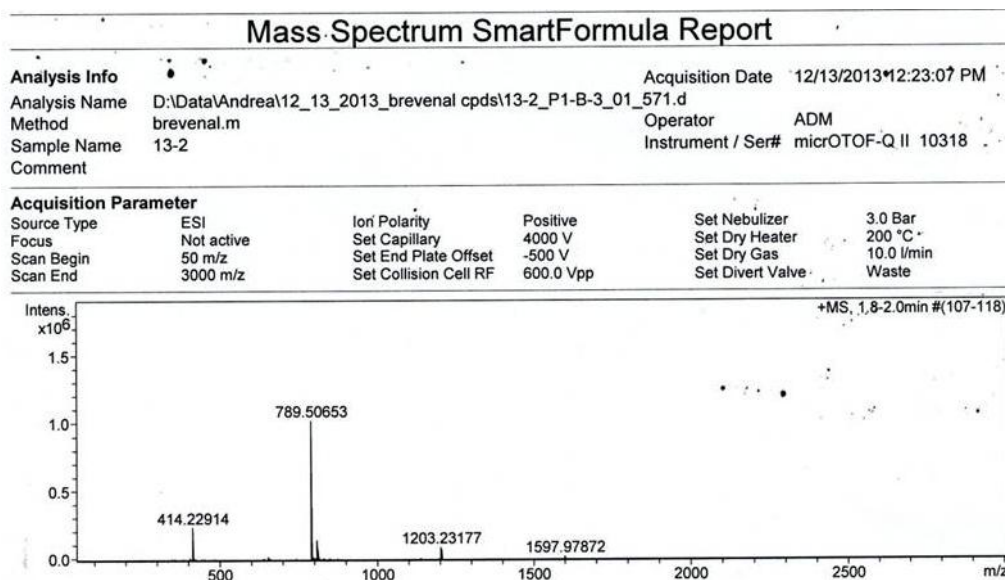

Figure S41. <sup>1</sup>H NMR spectrum of compound 31.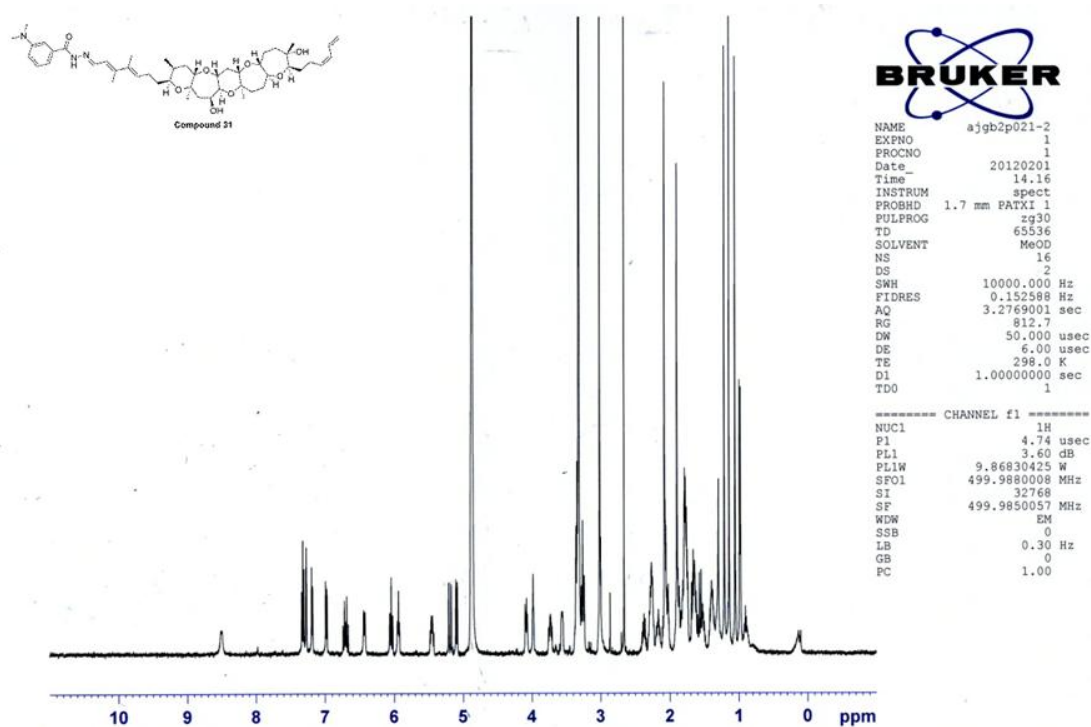

Figure S42. HRMS spectrum of compound 31.

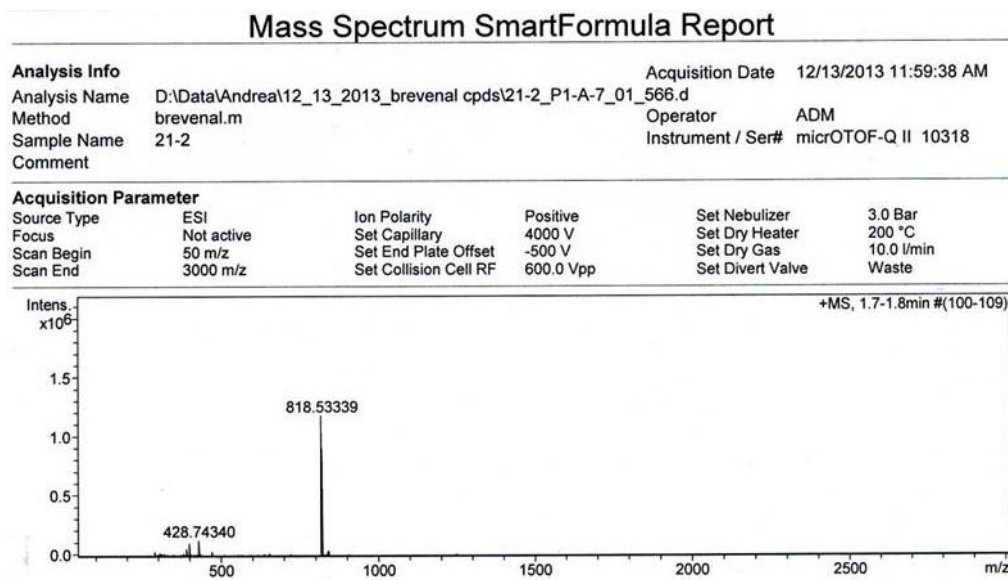

Figure S43.  $^1\text{H}$  NMR spectrum of compound 32.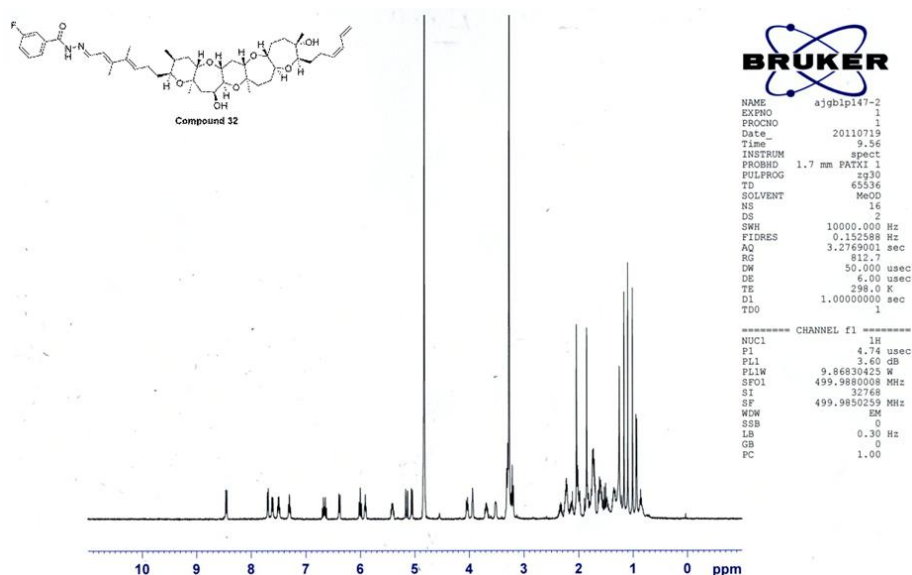

Figure S44. HRMS spectrum of compound 32.

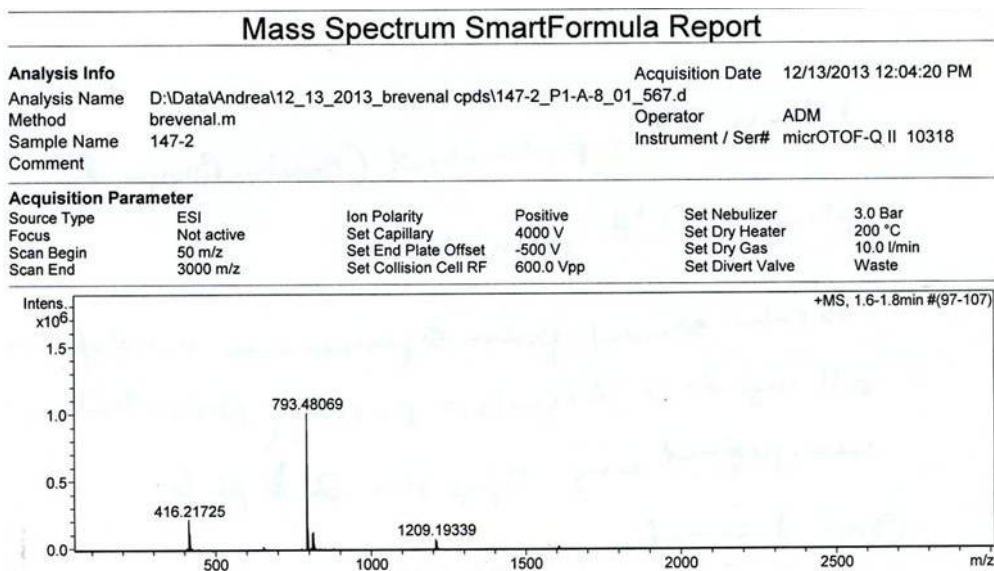

Figure S45.  $^1\text{H}$  NMR spectrum of compound 33.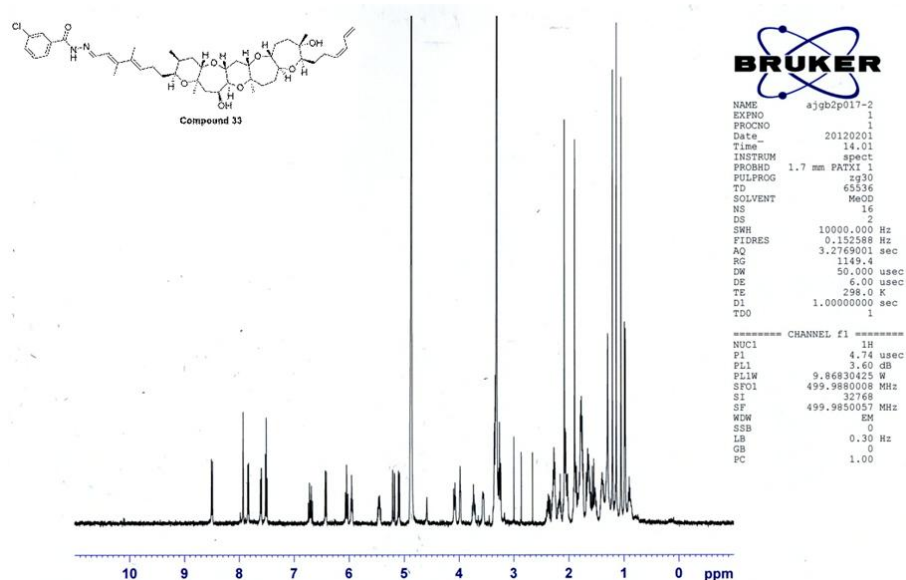

Figure S46. HRMS spectrum of compound 33.

## Mass Spectrum SmartFormula Report

|                      |                                                                  |                   |                        |
|----------------------|------------------------------------------------------------------|-------------------|------------------------|
| <b>Analysis Info</b> |                                                                  | Acquisition Date  | 12/20/2013 10:34:14 AM |
| Analysis Name        | D:\Data\Andrea\12_20_2013_brevenal cpds 2\P124-2_P1-B-6_01_588.d | Operator          | ADM                    |
| Method               | brevenal.m                                                       | Instrument / Ser# | micrOTOF-Q II 10318    |
| Sample Name          | <del>P124.2</del>                                                |                   |                        |
| Comment              |                                                                  |                   |                        |

**Acquisition Parameter**

|             |            |                       |           |                  |            |
|-------------|------------|-----------------------|-----------|------------------|------------|
| Source Type | ESI        | Ion Polarity          | Positive  | Set Nebulizer    | 3.0 Bar    |
| Focus       | Not active | Set Capillary         | 4000 V    | Set Dry Heater   | 200 °C     |
| Scan Begin  | 50 m/z     | Set End Plate Offset  | -500 V    | Set Dry Gas      | 10.0 l/min |
| Scan End    | 3000 m/z   | Set Collision Cell RF | 600.0 Vpp | Set Divert Valve | Waste      |

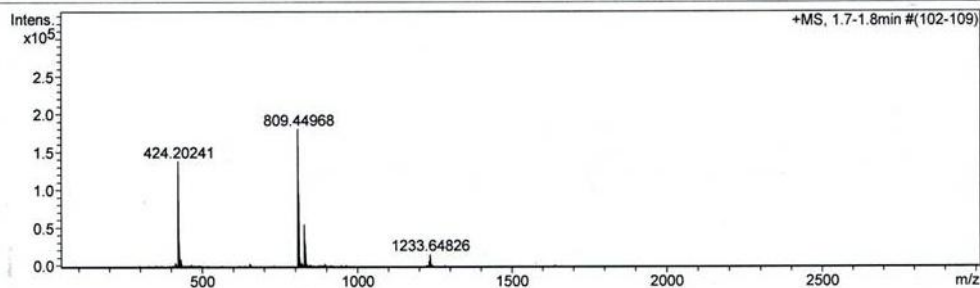

Figure S47.  $^1\text{H}$  NMR spectrum of compound 34.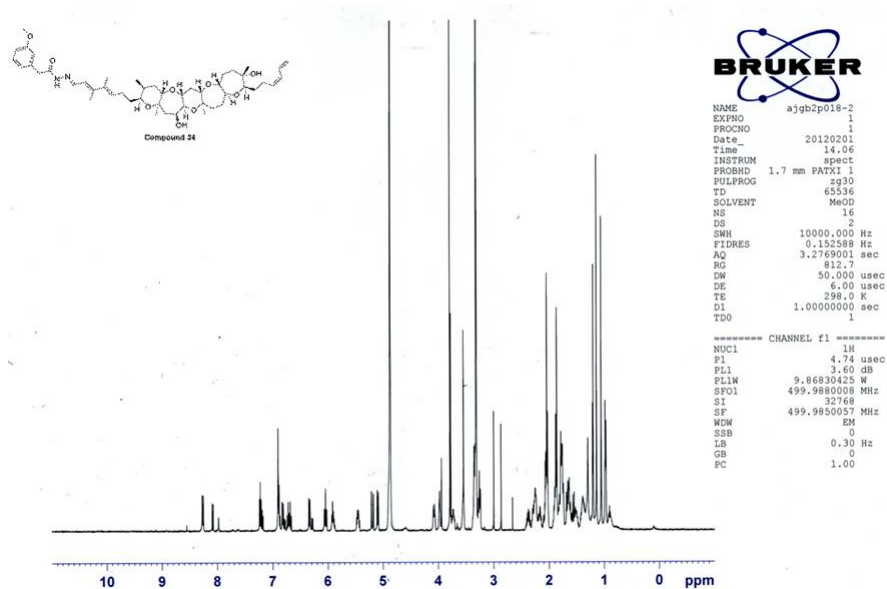

Figure S48. HRMS spectrum of compound 34.

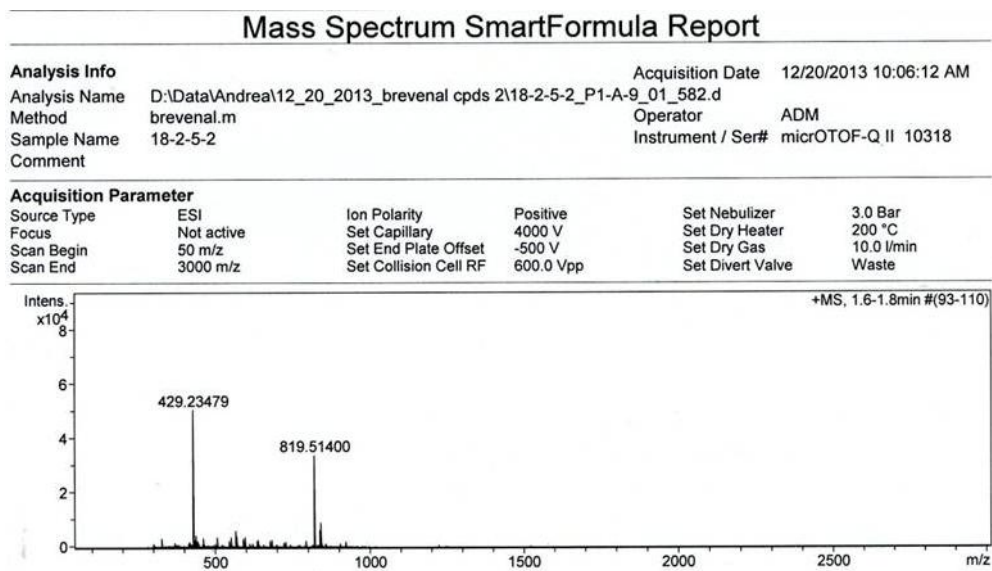



**Figure S49.**  $^1\text{H}$  NMR spectrum of compound 35.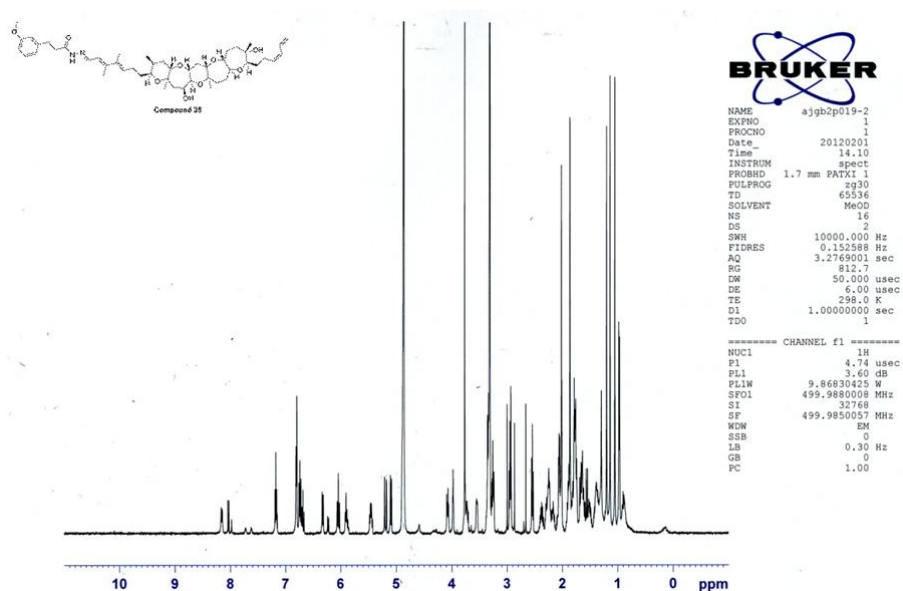**Figure S50.** HRMS spectrum of compound 35.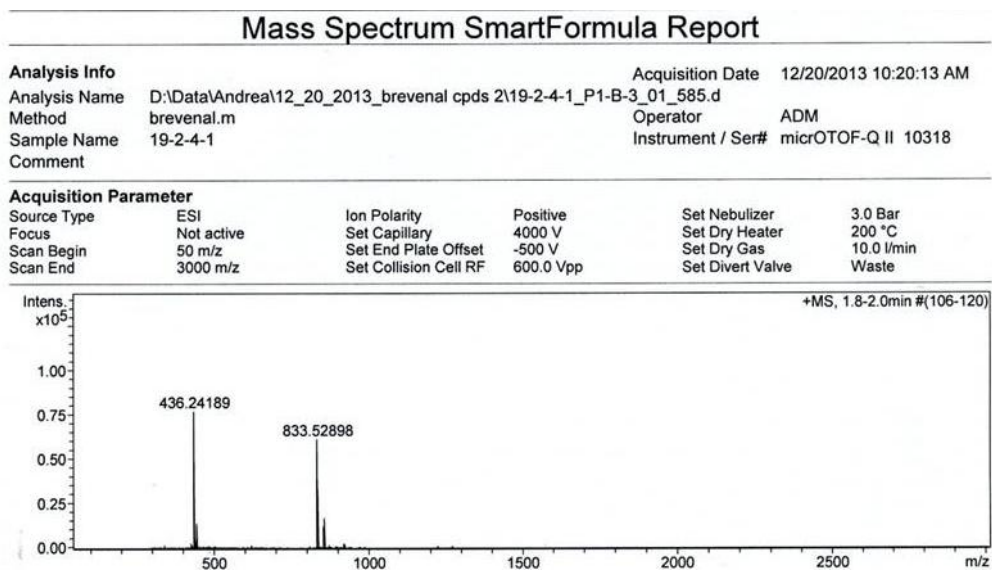

**Figure S51.**  $^1\text{H}$  NMR spectrum of compound 37.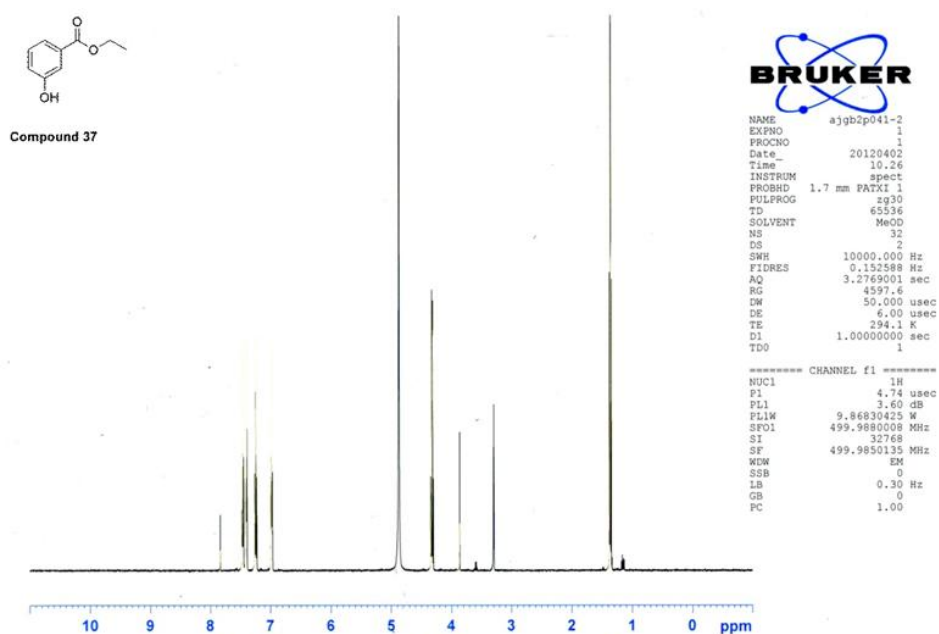**Figure S52.**  $^1\text{H}$  NMR spectrum of compound 38a.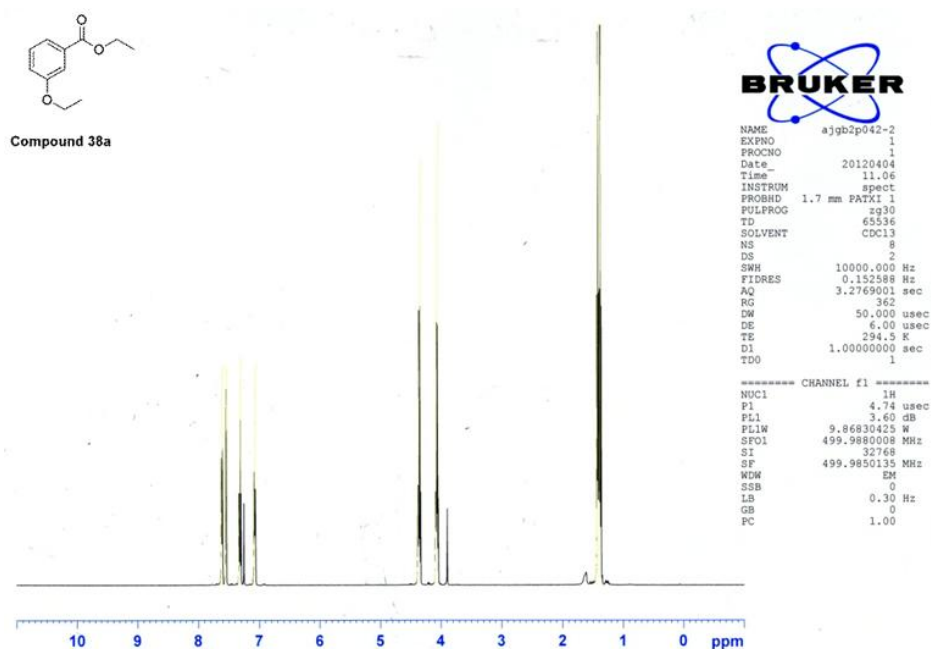

Figure S53.  $^1\text{H}$  NMR spectrum of compound 38b.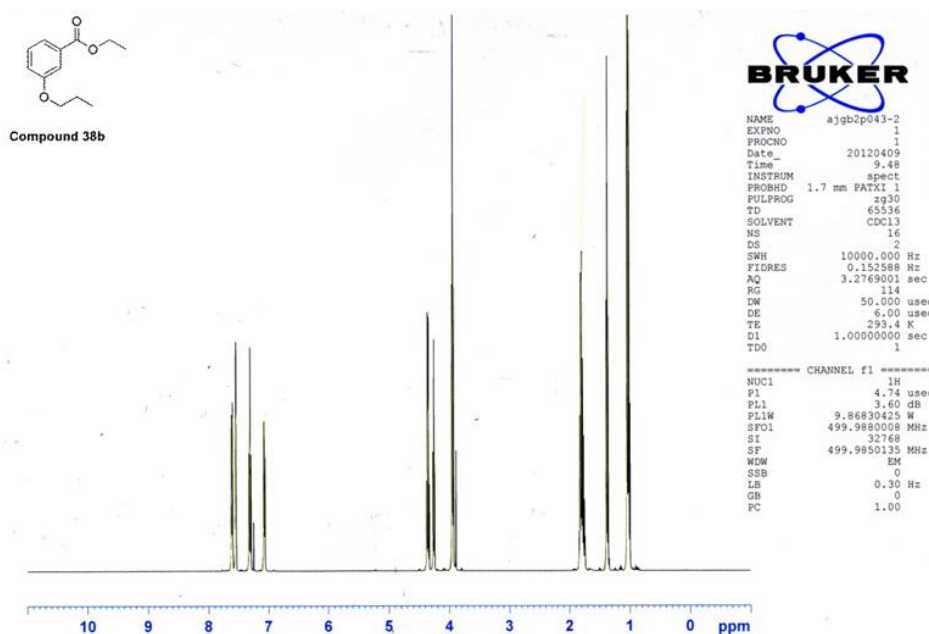Figure S54.  $^1\text{H}$  NMR spectrum of compound 38c.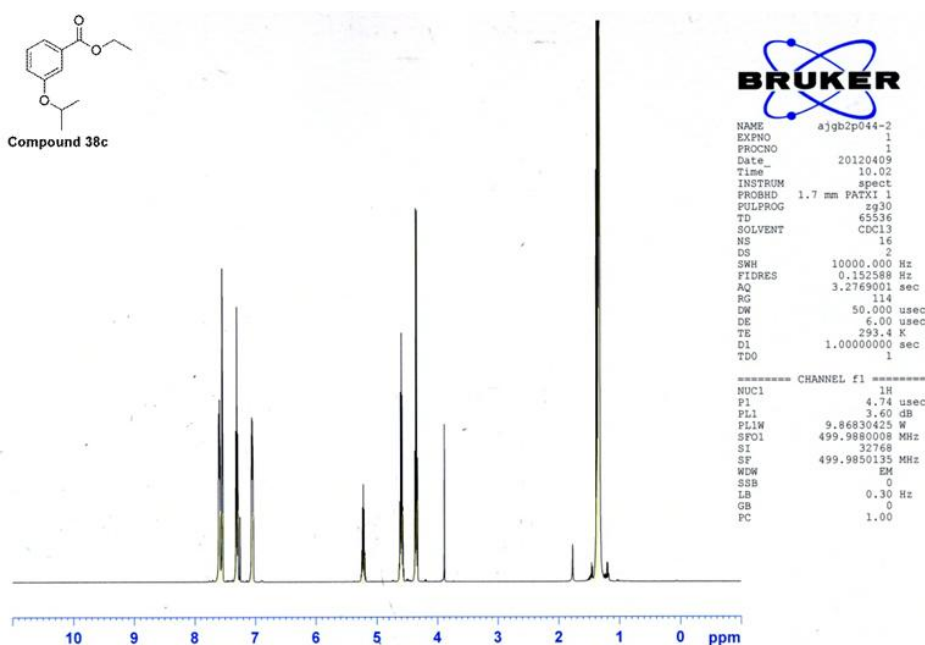

Figure S55.  $^1\text{H}$  NMR spectrum of compound 38d.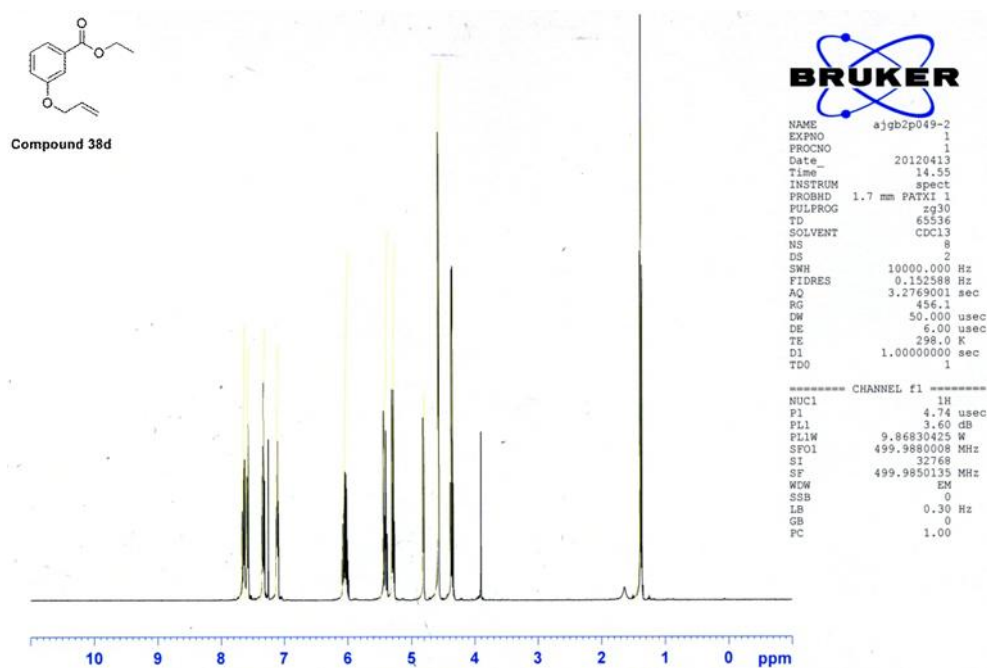Figure S56.  $^1\text{H}$  NMR spectrum of compound 39a.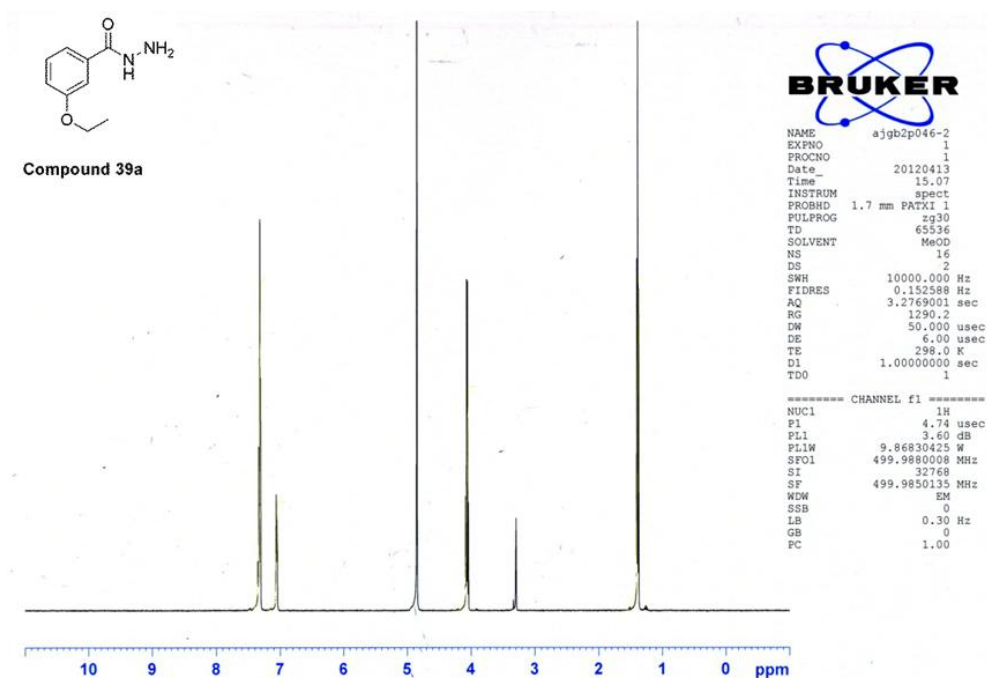

Figure S57. TIC and MS spectrum of compound 39a.

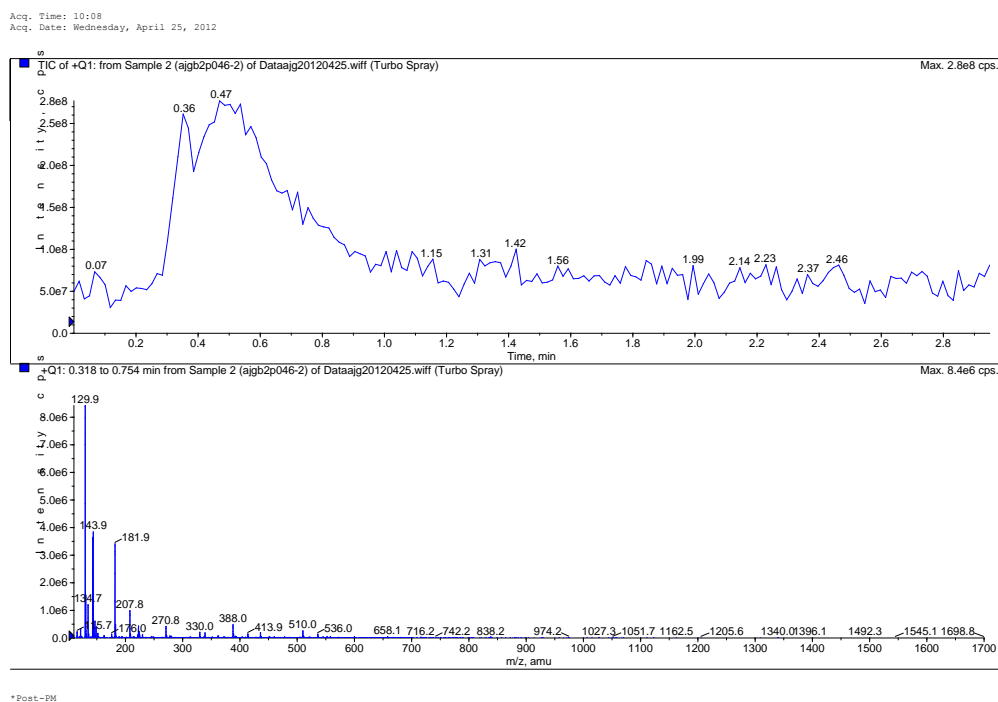Figure S58.  $^1\text{H}$  NMR spectrum of compound 39b.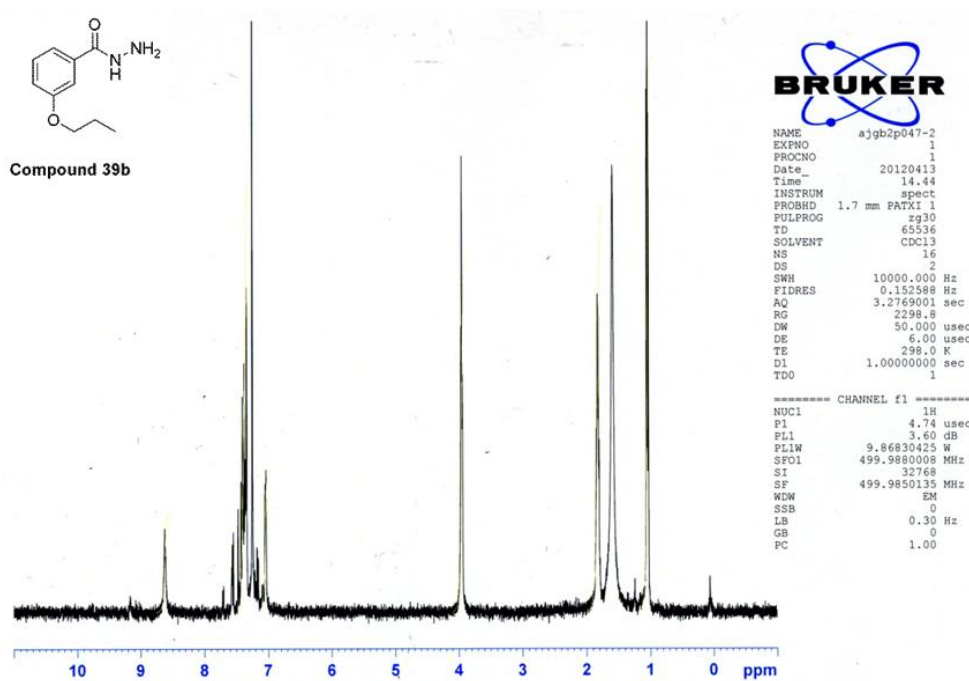

**Figure S59.** TIC and MS spectrum of compound **39b**.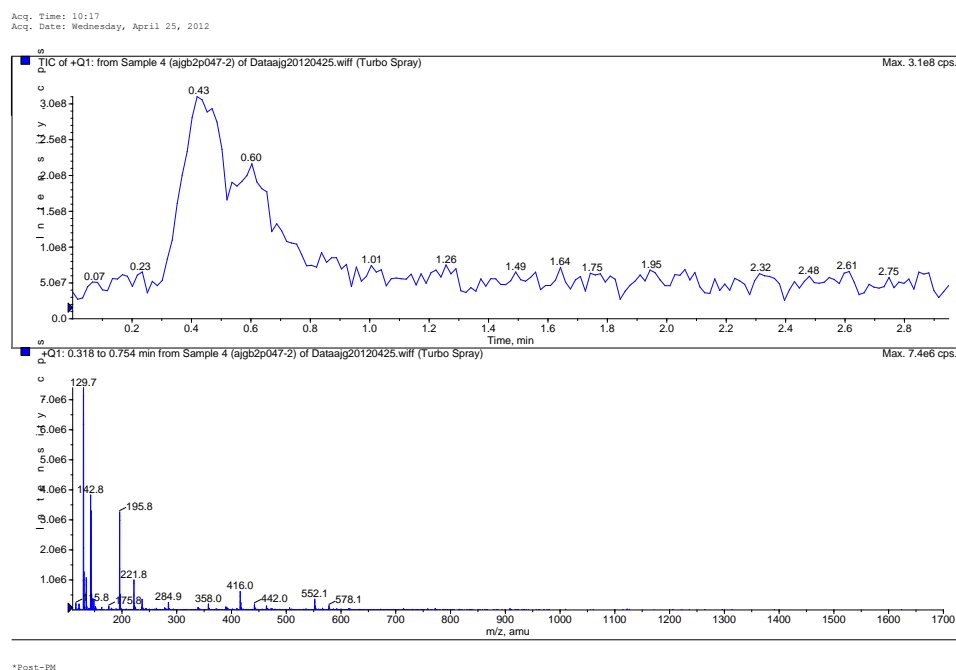**Figure S60.**  $^1\text{H}$  NMR spectrum of compound **39c**.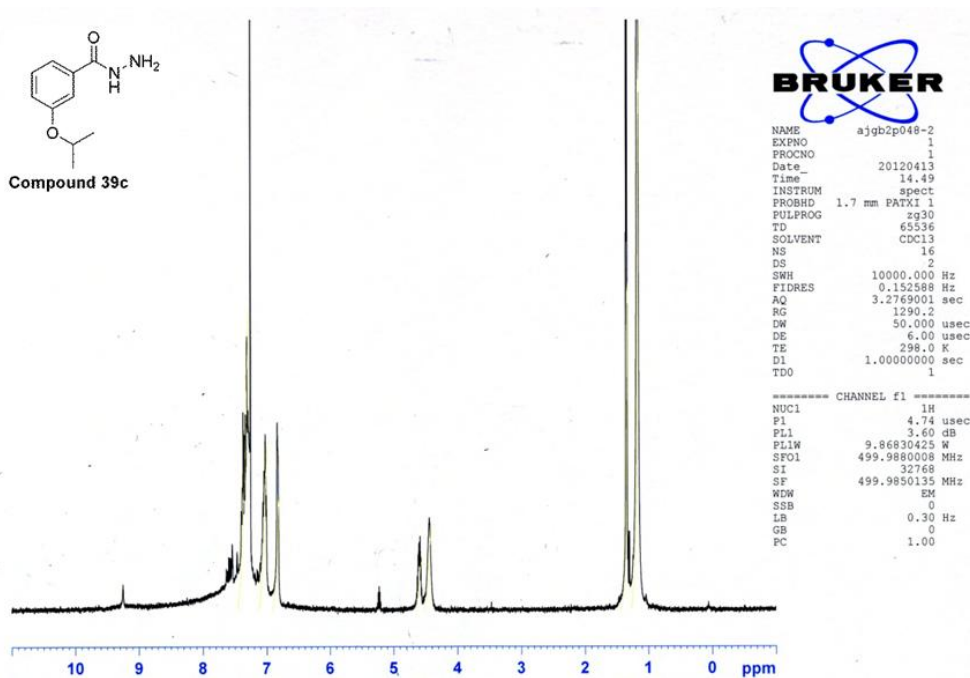



**Figure S61.** TIC and MS spectrum of compound **39c**.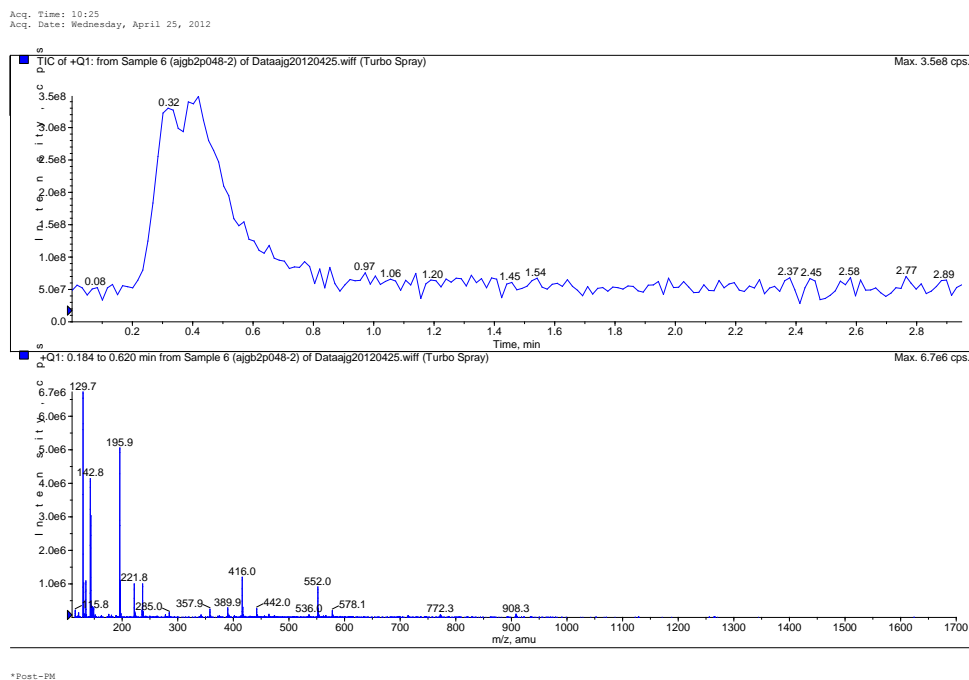**Figure S62.**  $^1\text{H}$  NMR spectrum of compound **39d**.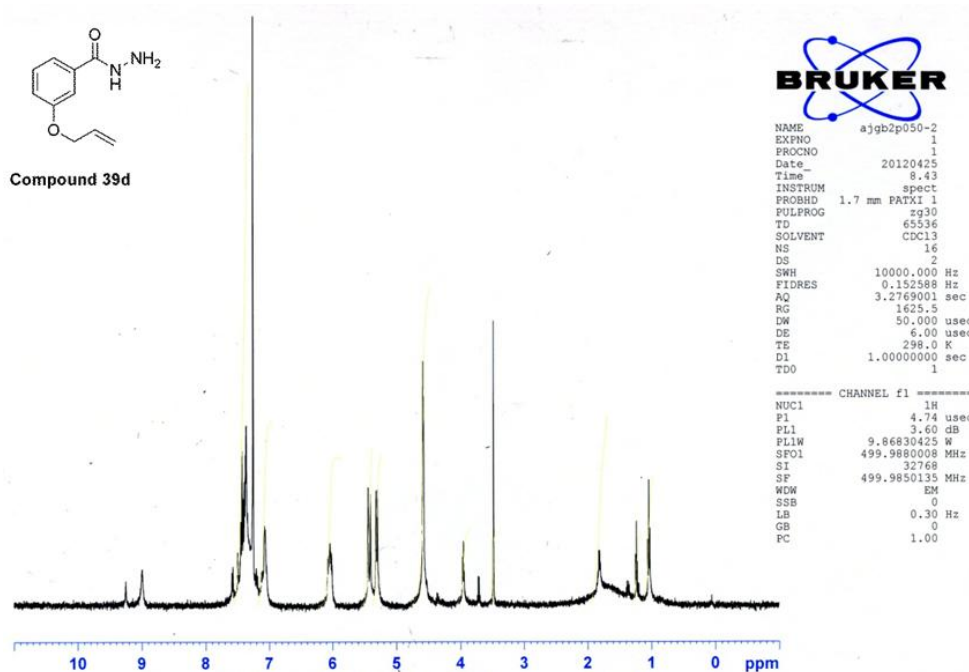

Figure S63. TIC and MS spectrum of compound 39d.

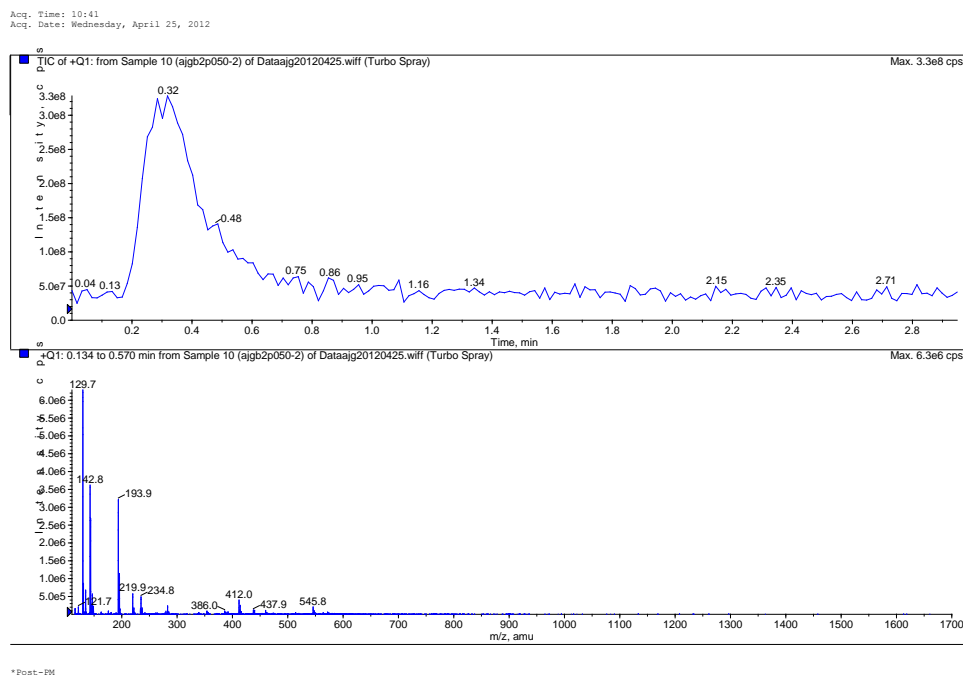Figure S64. <sup>1</sup>H NMR spectrum of compound 41.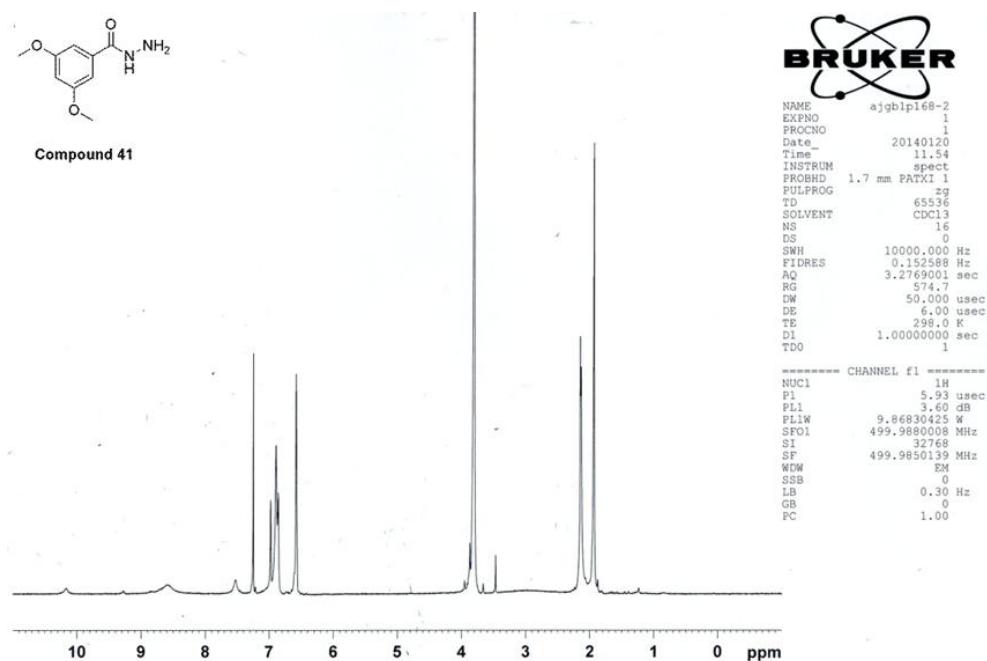

Figure S65. TIC and MS spectrum of compound 41.

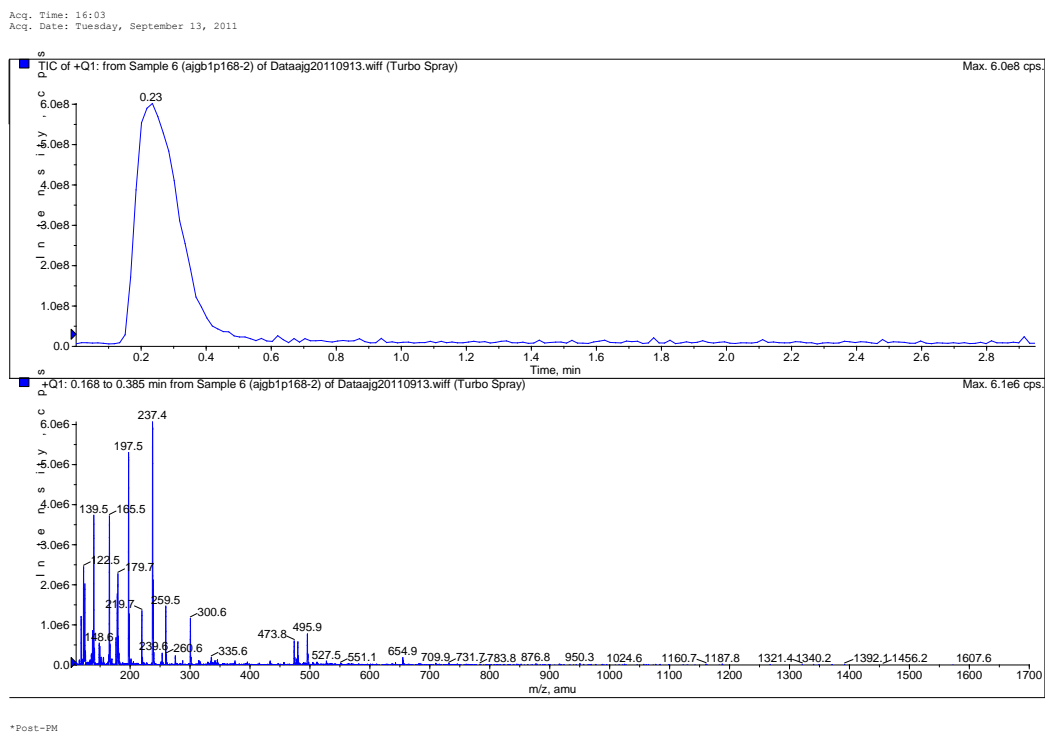Figure S66.  $^1\text{H}$  NMR spectrum of compound 44a.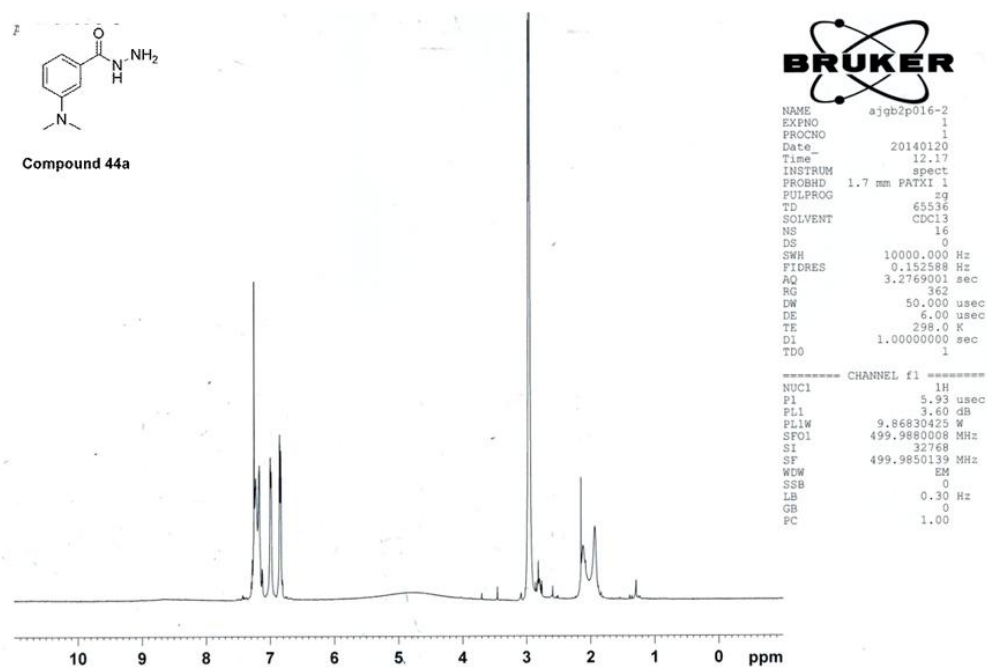

Figure S67. TIC and MS spectrum of compound 44a.

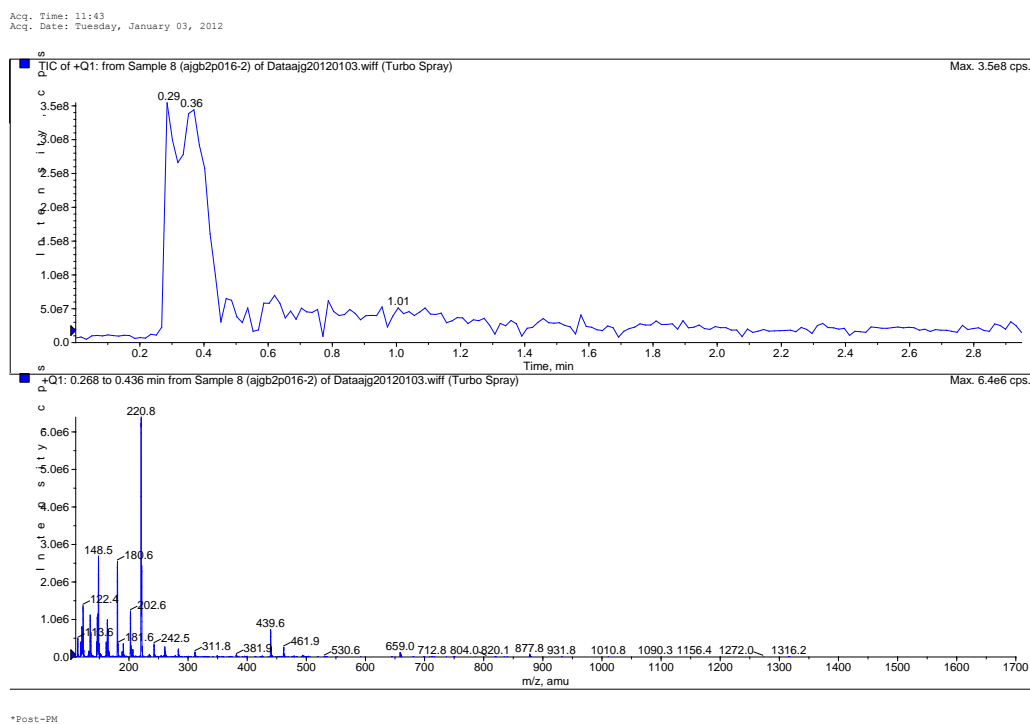Figure S68.  $^1\text{H}$  NMR spectrum of compound 44b.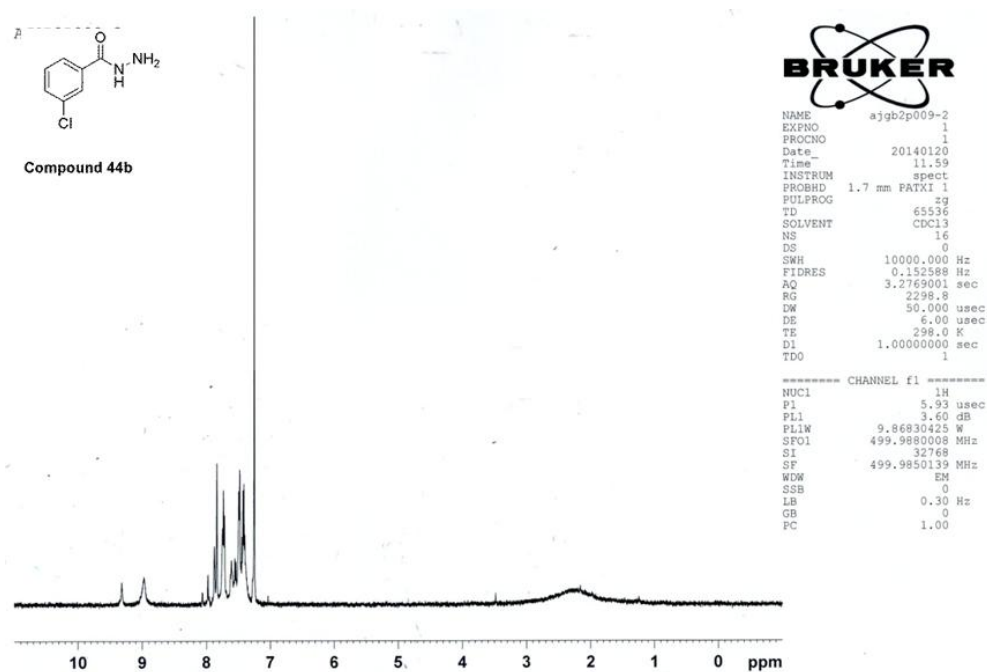

Figure S69. TIC and MS spectrum of compound 44b.

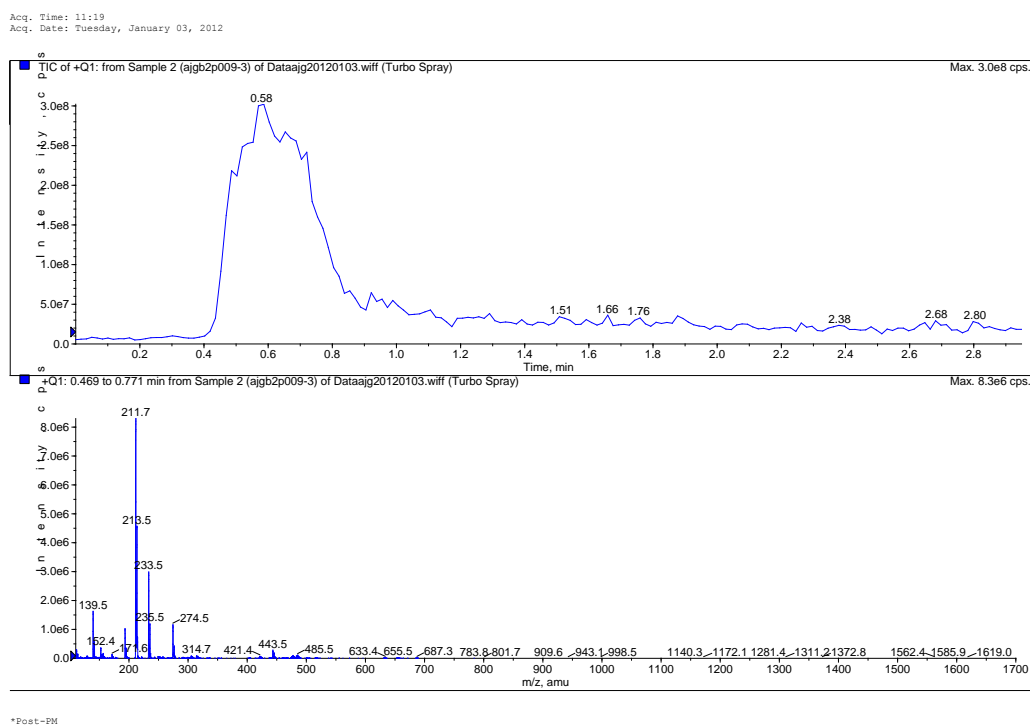Figure S70. <sup>1</sup>H NMR spectrum of compound 44c.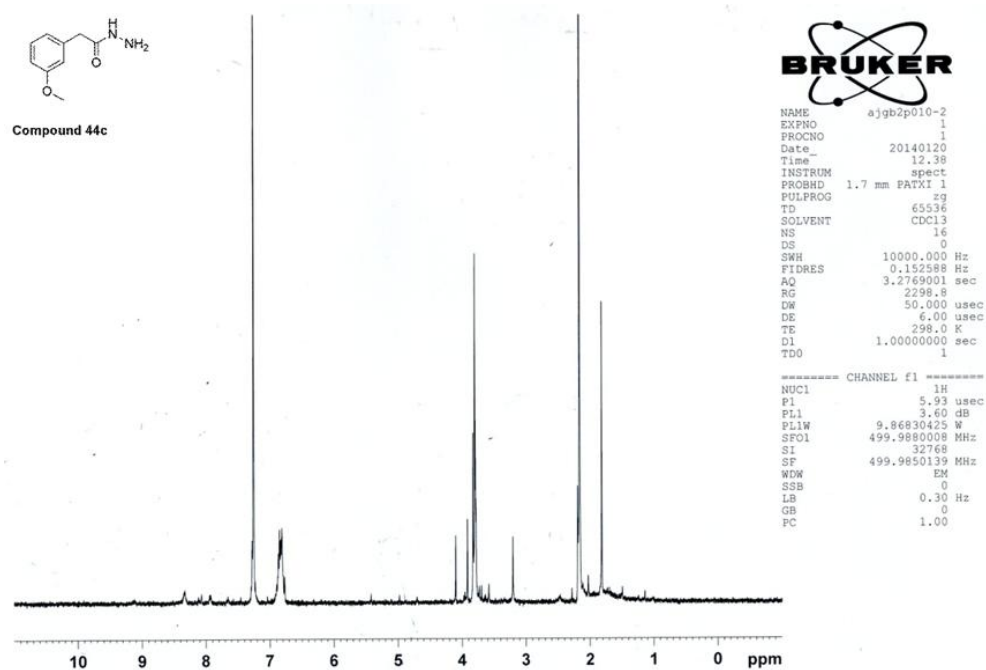

**Figure S71.** TIC and MS spectrum of compound **44c**.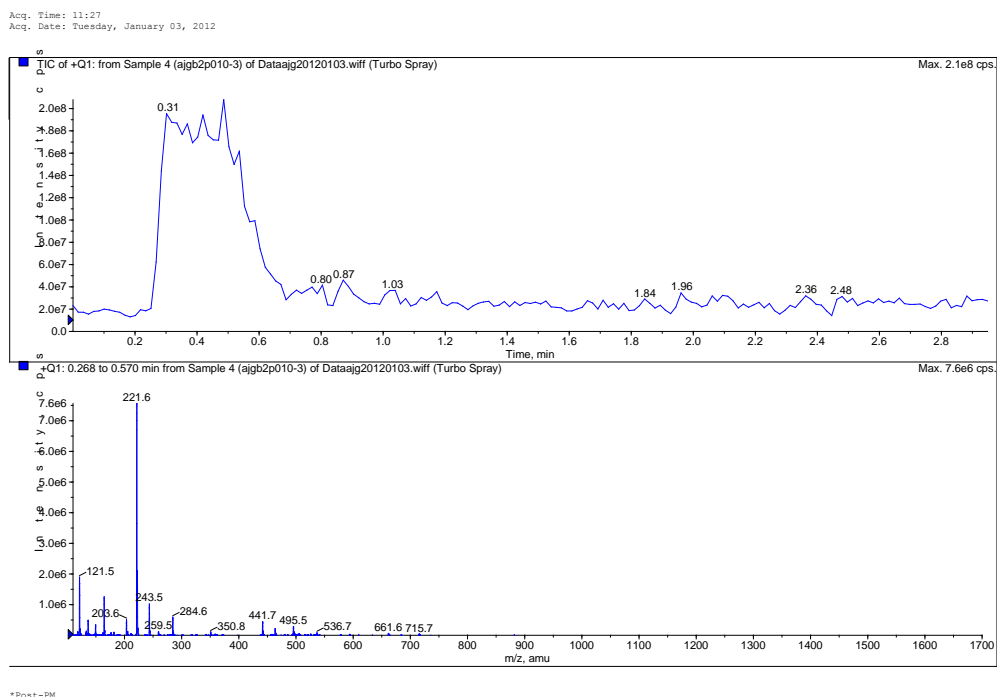**Figure S72.**  $^1\text{H}$  NMR spectrum of compound **44d**.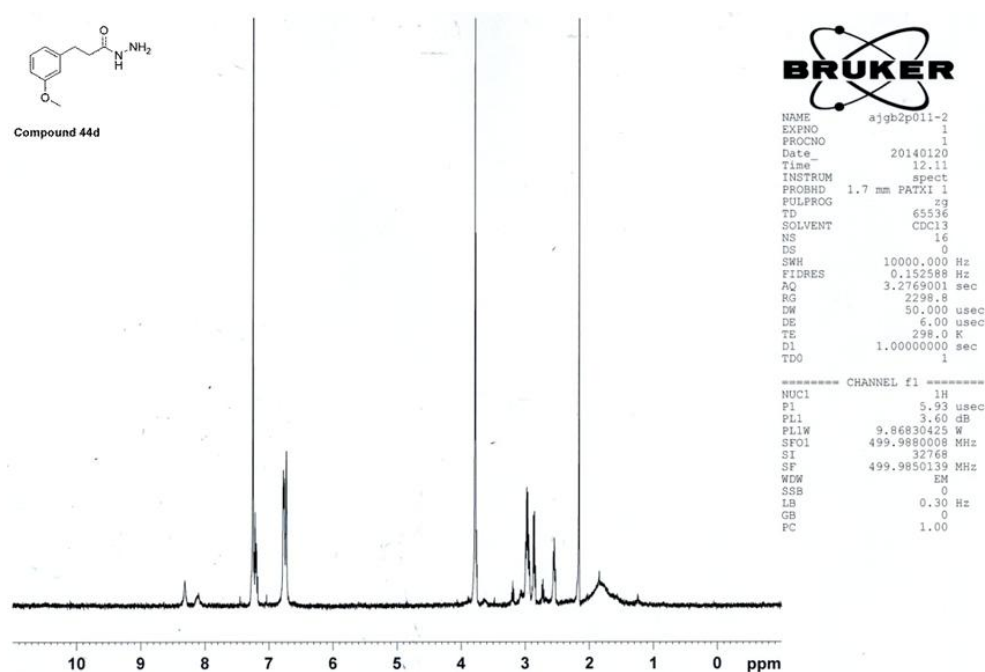



**Figure S73.** TIC and MS spectrum of compound **44d**.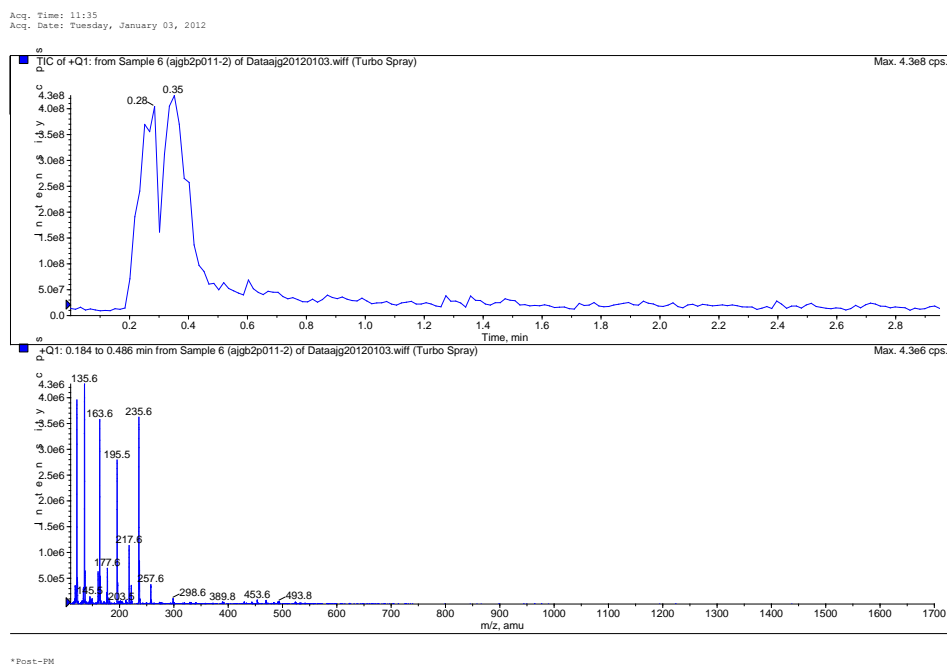

© 2014 by the authors; licensee MDPI, Basel, Switzerland. This article is an open access article distributed under the terms and conditions of the Creative Commons Attribution license (<http://creativecommons.org/licenses/by/3.0/>).
